# A Time-calibrated Firefly (Coleoptera: Lampyridae) Phylogeny: Using Genomic Data for Divergence Time Estimation

R.H. Time-calibrated Firefly Phylogeny

SEBASTIAN HÖHNA<sup>1,2</sup>, SARAH E. LOWER<sup>3</sup>, PABLO DUCHEN<sup>4</sup>, AND ANA CATALÁN<sup>1,5</sup>

<sup>1</sup>*GeoBio-Center, Ludwig-Maximilians-Universität München, 80333 Munich, Germany*

<sup>2</sup>*Department of Earth and Environmental Sciences, Paleontology & Geobiology,  
Ludwig-Maximilians-Universität München, 80333 Munich, Germany*

<sup>3</sup>*Department of Biology, Bucknell University, Lewisburg, PA 17837, U.S.A.*

<sup>4</sup>*Department of Computational Biology, University of Lausanne, 1015 Lausanne, Switzerland*

<sup>5</sup>*Division of Evolutionary Biology, Ludwig-Maximilians-Universität München  
Planegg-Martinsried 82152, Germany*

1 *Abstract*— Fireflies (Coleoptera: Lampyridae) consist of over 2,000 described extant species. A well-resolved  
2 phylogeny of fireflies is important for the study of their bioluminescence, evolution, and conservation. We  
3 used a recently published anchored hybrid enrichment dataset (AHE; 436 loci for 88 Lampyridae species and  
4 10 outgroup species) and state-of-the-art statistical methods (the fossilized birth-death-range process imple-  
5 mented in a Bayesian framework) to estimate a time-calibrated phylogeny of Lampyridae. Unfortunately,  
6 estimating calibrated phylogenies using AHE and the latest and most robust time-calibration strategies is  
7 not possible because of computational constraints. As a solution, we subset the full dataset and applied  
8 three different strategies: using the most complete loci, the most homogeneous loci, and the loci with the  
9 highest accuracy to infer the well established *Photinus* clade. The estimated topology using the three data  
10 subsets agreed on almost all major clades and only showed minor discordance with less supported nodes.  
11 The estimated divergence times overlapped for all nodes that are shared between the topologies. Thus,  
12 divergence time estimation is robust as long as the topology inference is robust and any well selected data  
13 subset suffices. Additionally, we observed an unexpected amount of gene tree discordance between the 436  
14 AHE loci. Our assessment of model adequacy showed that standard phylogenetic substitution models are  
15 not adequate for any of the 436 AHE loci which is likely to bias phylogenetic inferences. We performed  
16 a simulation study to explore the impact of (a) incomplete lineage sorting, (b) uniformly distributed and  
17 systematic missing data, and (c) systematic bias in the position of highly variable and conserved sites. For  
18 our simulated data, we observed less gene tree variation and hence the empirically observed amount of gene  
19 tree discordance for the AHE dataset is unexpected.

20 [AHE; Phylogeny; RevBayes.]

## INTRODUCTION

21

22 Fireflies (Coleoptera: Lampyridae) consist of more than 2,000 globally distributed described species renowned  
23 for their charismatic lighted mating signals. A time-calibrated phylogeny of fireflies would be useful to  
24 study their diversification, biogeographical history, and the evolution of their bioluminescence (Fallon et al.  
25 2018). Furthermore, divergence times on a genus level can provide new insights into recent colonization.  
26 However, a time-calibrated phylogeny of widely-sampled Lampyrids does not currently exist. The lack of a  
27 time-calibrated phylogeny might be surprising given the enigmatic status of fireflies but is possibly due to  
28 debated phylogenetic relationships (Branham and Wenzel 2001; Stanger-Hall et al. 2007; Martin et al. 2017)  
29 and general challenges in dating beetle phylogenies (Toussaint et al. 2017). A recent study by Martin et al.  
30 (2019) obtained 436 anchored hybrid enrichment loci (AHEs) for 88 Lampyridae species and 10 outgroup  
31 species. In this study, we will use this AHE dataset to estimate a time-calibrated phylogeny of Lampyridae.  
32 This study also serves as case-study to evaluate divergence time estimation using genomic data.

33 Genomic data, such as the AHE dataset by Martin et al. (2019), has promised to solve many outstanding  
34 phylogenetic debates (Rokas et al. 2003; Misof et al. 2014; Jarvis et al. 2014). Unfortunately, genomic data  
35 has introduced as many or more new challenges. One of the most prevalent problems of phylogenomics is  
36 that different “genomic” datasets (often a method-dependent sub-sample of the genome; Andermann et al.  
37 2020) and inference methods produce conflicting phylogenetic results with high support (Philippe et al.  
38 2017; Betancur-R et al. 2019). Most recent studies have focused on the impact on the inferred tree topology  
39 (*e.g.*, Arcila et al. 2017; Kuang et al. 2018; Alda et al. 2019; Bossert et al. 2021), but other aspects of the  
40 phylogenetic inference still need much study. For example, it has been shown that outlier loci (Brown and  
41 Thomson 2017; Shen et al. 2017; Walker et al. 2018) and data filtering methods can have a strong impact  
42 on the inferred phylogeny. Much less attention has been paid on estimating divergence time using genomic  
43 datasets (but see Smith et al. 2018).

44 The two most common approaches for inferring (uncalibrated) phylogenies from genomic data are con-  
45 catenation of all loci and two-step coalescent-based methods. The concatenation method (*e.g.*, RAxML (Sta-  
46 matakis 2014) and IQ-TREE (Minh et al. 2020)) merge all loci together and assume that all loci evolve under  
47 the same topology with the same branch lengths. Two-step coalescent-based methods (*e.g.*, ASTRAL, Zhang  
48 et al. 2018) estimate first the per-locus gene trees and then estimate the species assuming a multispecies  
49 coalescent approach. Current two-step approaches are considered superior due to their ability to incorporate  
50 incomplete lineage sorting (ILS) but do not provide time-calibrate phylogenies. Therefore, we cannot use a  
51 two-step coalescent-based approach to estimate divergence times. The only currently existing methods using  
52 sequence data directly to estimate time calibrated phylogenies are full Bayesian coalescent-based methods  
53 and concatenation methods for divergence time estimation.

54 Today, there exists no consensus on estimating a time-calibrated phylogeny using genomic data. Ideally  
55 we would like to use all loci and full Bayesian inference methods using relaxed clocks (Drummond et al. 2006).  
56 Unfortunately, full Bayesian inference is impossible for genomic datasets due to computational limitations

57 (Harrington et al. 2016; Li et al. 2020). Common approaches include (1) penalized-likelihood methods such  
58 as `r8s` (Sanderson 2003) and `treePL` (Smith and O’Meara 2012) (see for example Hamilton et al. 2019; Alda  
59 et al. 2019; Opatova et al. 2020; Burbrink et al. 2020); (2) approximate-likelihood methods as implemented  
60 in PAML (see for example Harrington et al. 2016; McGowen et al. 2020; Li et al. 2020), and (3) full-likelihood  
61 Bayesian divergence time analysis using a relaxed clock model, as implemented in `BEAST` (Drummond et al.  
62 2012) and `RevBayes` (Höhna et al. 2016), on a subset of the available data (see for example Harrington et al.  
63 2016; Ericson et al. 2020; Bianconi et al. 2020).

64 Penalized likelihood approaches are faster to compute but do not use the sequence data directly. Thus  
65 penalized likelihood approaches are less robust because they do not fully take the uncertainty in branch  
66 length estimates into account (Ho and Duchêne 2014). Approximate-likelihood methods are also faster than  
67 full-likelihood methods but their accuracy has not been compared against another. Since full-likelihood Bayes  
68 divergence times methods are most widely used and well established, we focus on and explore the third option.  
69 Specifically, we will focus on different approaches to sub-sample the full AHE dataset. Several approaches  
70 to subsample the full dataset have been proposed: (1) choose a random subset of the loci (Harrington et al.  
71 2016; Alda et al. 2019; Ericson et al. 2020), (2) choose the most complete loci (Harrington et al. 2016),  
72 and (3) choose the loci with lowest GC variation (Romiguier et al. 2013). Additionally to the second and  
73 third option, we selected loci with a high phylogenetic accuracy to recover the established genus *Photinus*.  
74 Before estimating the divergence time using the three concatenated data subsets, we explored each single  
75 AHE locus to identify reliable loci and exclude outlier loci (Brown and Thomson 2017; Walker et al. 2018).  
76 We estimated the phylogeny using each AHE locus individually, producing 436 posterior distributions of  
77 phylogenetic trees. We used these individual phylogenies to (1) explore the gene-tree discordance, (2) support  
78 for named sub-families, tribes and genera, (3) correlation between data summary statistics and gene tree  
79 error. Finally, we performed a simulation study to test the impact of (a) incomplete lineage sorting, (b)  
80 uniformly distributed and systematic missing data, and (c) systematic bias in the position of highly variable  
81 and conserved sites. All of the methods described in this paper have been implemented in the Bayesian  
82 phylogenetic inference software package `RevBayes` (Höhna et al. 2016).

## 83 METHODS AND DATA

### 84 *Lampyridae Anchored Hybrid Enrichment (AHE) Dataset*

85 In this study we used the 436 anchored hybrid enrichment sequences from Martin et al. (2019). The dataset  
86 contains 88 Lampyridae species and 10 outgroup species. The AHEs have been trimmed and cleaned (Martin  
87 et al. 2019). Martin et al. (2019) kept only loci with an overall sequence completeness of 50%. Here we use  
88 exactly the same alignments downloaded from doi:10.5061/dryad.737c8t8.

89 Our specific focus in this study is the genus *Photinus*. *Photinus* is the second most speciose genus of  
90 Lampyridae comprising of  $\approx 240$  species with a Nearctic and Neotropical distribution (McDermott 1964).  
91 Only in the past 15 years more than 40 new *Photinus* species have been described (Zaragoza-Caballero 2007,

92 2015; Zaragoza-Caballero et al. 2020). It is hypothesized that the origin of *Photinus* resides in Tropical  
93 America (McDermott 1964) and the estimation of the age of this genus will be the first step into elucidating  
94 its biogeographical history.

95 Fireflies from the genus *Ellychnia* were traditionally placed outside *Photinus* but recent molecular studies  
96 have shown that *Photinus* is paraphyletic and *Ellychnia* is grouped within it (Stanger-Hall et al. 2007; Lewis  
97 and Cratsley 2008; Lower et al. 2017; Martin et al. 2017). From a morphological perspective, *Ellychnia* and  
98 *Photinus* share morphological characteristics that support placing these into the same genus (). Thus, we  
99 consider the combined clade of *Photinus* and *Ellychnia* in this study.

100 *Sequence coverage*— First, we explored the sequence coverage of the 436 sequence alignments. Figure S1  
101 shows the percentage of missing sites per taxon and AHE locus. That is, we specifically looked whether a  
102 given taxon (*i.e.*, column) or locus (*i.e.*, row) had considerable lower sequence coverage (white or light gray).  
103 The distribution of missing sites is not homogeneous and particular taxa are more affected than others.  
104 Sequences for *Photinus* and *Ellychnia* species had a comparably high sequence coverage.

105 *Data summary statistics*— We computed several summary statistics for the data which might indicate the  
106 usefulness of each AHE locus. The summary statistics were: (1) number of variable sites, (2) number of  
107 invariable sites, (3) minimum pairwise distance between any taxon pair, (4) maximum pairwise distance  
108 between any taxon pair, (5) minimum GC content of any taxon for this locus, (6) maximum GC content of  
109 any taxon for this locus, (7) average GC content for this locus, (8) variance in GC content over all taxa for  
110 this locus.

111 The number of variable sites should be a predictor for the informativeness of the locus, with the ex-  
112 pectation that loci with a higher number of variable sites have more information to resolve the phylogeny  
113 correctly. Conversely, the number of invariant sites should be lower to obtain more phylogenetic information.  
114 Nevertheless, it might be the case that if all sites are variable (*i.e.*, no invariant sites), then the locus is likely  
115 saturated and most information is lost due to multiple substitutions. Alternatively, we could use the fraction  
116 of variable sites to invariant sites, although this fraction is only informative in the context of the sequence  
117 length. Therefore we used the number of variable and invariant sites directly to avoid redundancy.

118 The minimum pairwise distance shows how well we can expect to resolve the phylogeny on a species  
119 level. If there are some species with identical sequences for this AHE locus, then we have no information  
120 about the species except that they should be very closely together. The maximum pairwise distance can  
121 indicate if there are outlier sequences which bias our phylogenetic reconstruction. If such outlier sequences  
122 with high pairwise distance to all other sequence exist, then this indicates non-orthologous sequences or  
123 miss-alignments which will lead to wrong placements of the taxa in the inferred phylogeny.

124 The GC content has been suggested to be an indicator of gene tree error with GC rich loci having a higher  
125 error (Romiguier et al. 2013). Similarly, a high variance in GC content could indicate branch heterogeneous  
126 or non-stationary substitution processes, for example due to convergent evolution which would also bias  
127 phylogenetic inference.

128

## *Exploration of Individual AHE Loci*

129 *Inference of phylogenies per AHE locus*— We performed a phylogenetic analysis for each individual loci. The  
130 goal was to estimate the tree topology and species relationships without confounding factors of molecular  
131 clocks and divergence times. Therefore, we performed a standard Bayesian phylogenetic analysis, which  
132 had been shown recently to perform best for AHE loci (Bossert et al. 2021). Our pipeline consisted of a  
133 GTR+Gamma+I substitution model (Tavaré 1986; Yang 1996) and a uniform prior on tree topologies with  
134 an exponential prior distribution on the branch lengths (Höhna et al. 2017). We ran four replicated MCMC  
135 runs with 50,000 iterations each (with, on average, 167.8 moves per iteration). We sampled phylogenies  
136 every iteration.

137 *Posterior support of known clades*— For each AHE locus, we computed the posterior probability of 26  
138 named subfamilies, tribes and genera (see Table S1). We only computed the posterior probability if the locus  
139 contained at least two species with more than 50% sequence coverage. Specifically, we computed the posterior  
140 probability if the given clade was found to be strictly monophyletic according to known classifications. The  
141 posterior probabilities show us (a) which known clades are supported, and (b) how much variation in support  
142 exists for the known clades. We expect that well established clades, such as *Photinus + Ellychnia*, should  
143 overall be well supported. Nevertheless, we would not be surprised to see some variation in support as  
144 gene trees are expected to be different from species trees (Maddison 1997). For example, the multispecies  
145 coalescent process predicts that gene trees can be different to the species tree if internal branches are very  
146 short and population sizes are very large (Rosenberg and Tao 2008; Huang and Knowles 2009). However, the  
147 discordance between species tree and gene trees should be restricted to local difference within few coalescent  
148 units (Degnan and Rosenberg 2009) and not produce gene trees that are drastically different from the species  
149 tree.

150 *Model Adequacy Testing*— Additionally, for each locus we performed posterior prediction simulations to  
151 check for model adequacy using the  $P^3$  pipeline (Höhna et al. 2018). Posterior predictive distributions  
152 are used to perform model adequacy testing, *i.e.*, testing the *absolute* fit of a model to the observed data  
153 (Bollback 2002). If the model shows a bad absolute fit to the data, then estimates, such as the tree topology,  
154 can be biased (Brown 2014). For example, if our model predicts much lower variation in GC content among  
155 sequences, then our inference might wrongly group taxa with low (or high) GC content together (Romiguier  
156 et al. 2013).

157 Posterior predictive distributions are simulated using parameters values (*e.g.*, phylogeny and substitution  
158 rates) drawn from the posterior distribution. Thus, we used posterior distributions for each AHE locus from  
159 the above MCMC analyses. We discarded the initial 50% of samples as burnin and used the remaining  
160 100,000 samples (four replicates with originally 50,000 samples each). Finally, we computed the posterior  
161 predictive p-values as frequency how often the summary statistic of the observed data was larger or equal to  
162 the summary statistic computed using the simulated data (midpoint p-values; Höhna et al. (2018)). That is,  
163 if we obtain a very low p-value, then most or all of our simulated datasets have a larger summary statistic.

164 For example, if our empirical alignment had very few variable sites and most simulated datasets had more  
165 variable sites, then the p-value would be close to zero. Conversely, a high posterior predictive p-value depicts  
166 larger summary statistics from the observed data compared with the simulated data.

### 167 *Simulation Study*

168 We performed a simulation study as a benchmark and reference for our single locus phylogenetic analyses.  
169 Specifically, we focused on (1) the discordance between gene trees and species trees under the multispecies  
170 coalescent model, (2) the impact of missing sequence data on phylogeny inference and model adequacy testing,  
171 and (3) the impact of unequal distribution of fast versus slow evolving sites in combination with missing  
172 sequence data on phylogeny inference and model adequacy testing.. First, under the multispecies coalescent  
173 model we expect that gene trees differ from the species to some extent purely due to the stochastic process  
174 (Degnan and Rosenberg 2009). For example, assuming a population size of 100,000 diploid individuals and a  
175 generation time of one year, the expected time of a coalescent event between two individuals is 200,000 years.  
176 Then, if the branch leading to the next speciation event is shorter than the coalescent time between two  
177 individuals, then we could observe deep coalescent events with incomplete lineage sorting. Thus, to observe  
178 incomplete lineage sorting the population size needs to be sufficiently large and/or the internal branch length  
179 needs to be sufficiently short. In our simulations, we simulated 436 gene trees within the fixed species tree  
180 (see below) and three different population sizes: 100,000 diploid individuals, 1,000,000 diploid individuals  
181 and 10,000,000 diploid individuals. The chosen population sizes for the simulations were based on known  
182 insect effective population sizes (Keightley et al. 2015; Crossley et al. 2019; Arguello et al. 2019; Kapopoulou  
183 et al. 2020).

184 Second, the AHE dataset —as most phylogenomic datasets— are far from complete and missing sequence  
185 data is heterogeneously distributed (see Figure S1). On the one hand, missing sequence data can impact  
186 phylogeny inference, specifically if some taxa have a high fraction of missing sequence data (Sanderson  
187 et al. 1998). These taxa are often rogue and cannot be placed with certainty or correctly in the phylogeny  
188 (Thomson and Shaffer 2010). On the other hand, several simulation studies have shown that if missing  
189 data is homogeneously distributed or the number of informative sites is large, then missing data are not  
190 problematic (Wiens 2003; Roure et al. 2013). Much less attention has been given to model adequacy testing  
191 and computing summary statistics with missing sequence data. For example, if a given site (*i.e.*, column)  
192 in the alignment contains mostly missing sites but the few actual sites are identical, it is then unclear if this  
193 site is invariant or not. Thus, missing sites can impact our calculation of summary statistics, and thus our  
194 evaluation of model adequacy. Here, we explore the impact of missing data with a specific focus on how  
195 missing data is distributed in AHE datasets.

196 We simulated sequence alignments for each of the three sets of 436 gene trees as follows. We simulated  
197 branch rates from a uncorrelated lognormal relaxed clock model with mean  $1.836 \times 10^{-3}$  (in million years)  
198 and standard deviation of 0.58. Then, we simulated sequence data under a GTR+ $\Gamma$  model with base  
199 frequencies  $\pi = \{0.31, 0.17, 0.19, 0.33\}$ , substitution rates  $\epsilon = \{0.087, 0.295, 0.08, 0.09, 0.38, 0.068\}$  and site  
200 rate categories  $r = \{0.039, 0.271, 0.841, 2.849\}$ . The lengths of the sequences was determined from the

201 corresponding empirical alignment. All values were retrieved from the empirical concatenated analysis to  
202 provide biologically realistic simulation settings. Additionally, each simulated alignment was masked so that  
203 the same positions in the data matrix were missing for both the empirical dataset and simulated dataset. This  
204 procedure to create alignments with missing data by applying masks obtained from the empirical alignments  
205 produce patterns where missing data are non uniformly distributed but clustered around the beginning and  
206 end of the alignment as well as on given taxa (see Supplementary Figures S12-S14). Thus, we obtained two  
207 sets of alignments for each simulated alignment.

208 Third, the AHE dataset has a heterogenous distribution of variable sites where most variable sites are  
209 at the flanking regions and most invariable sites are in the center of the locus (Faircloth et al. 2012). This  
210 heterogeneous distribution of fast versus slow evolving sites stands in strong contrast to the model assumption  
211 of standard phylogenetic models. The among site rate variation model (+ $\Gamma$ ) allows for rate variation using  
212 four discrete rate categories but each site evolves independently and identically distributed. That is, each site  
213 has a probability of 0.25 to be in any of the four rate categories regardless of the position in the alignment  
214 (center vs. beginning/end). This model violation might not be a problem for many phylogenetic analyses.  
215 However, the combination of missing data that is more prevalent at the same positions as highly variable sites  
216 could induce a systematic bias. We explored this potential systematic bias by repeating the above simulation  
217 with rate categories drawn deterministically depending on the position in the alignment. Specifically, we  
218 divided the alignment in eight equal-sized regions where the outer regions received the highest of the four  
219 rate categories and the middle regions the lowest rate categories respectively.

220 In total, we simulated three sets of 436 gene trees and four alignments per gene trees (436 loci x 3  
221 population sizes x 2 levels of missing data x 2 modes of rate variation = 5232 simulated alignments). We  
222 analyzed each simulated alignment with the same inference pipeline as the empirical AHE dataset. We  
223 performed an MCMC analysis for each alignment, a posterior predictive simulation, and computed the  
224 posterior predictive p-values and posterior probabilities of the pre-defined clades.

### 225 *Divergence time estimation of Lampyridae phylogeny*

226 For the Lampyridae divergence time estimation we used the 436 ultra-conserved elements (AHEs) recently  
227 published by Martin et al. (2019). Because of computational limitations we could not perform a phylogenetic  
228 analysis on all 436 AHE loci jointly with a model of appropriate complexity (*e.g.*, each AHE loci having  
229 its own unlinked GTR+ $\Gamma$  substitution model). Instead, we selected three data subsets (Figure 1). The  
230 first data subset contained all loci with at 95% sequence coverage (Figure 1) because gappy sequences (*i.e.*,  
231 low sequence coverage) could indicate sequencing and/or alignment problems. Additionally, missing data  
232 reduce information in the alignment (Philippe et al. 2004) and we aimed to maximize the phylogenetic  
233 information for the associated computational cost. The second data subset contained all AHE loci which  
234 supported the genus *Photinus* to be monophyletic because we constrained *Photinus* to be monophyletic  
235 for the fossil calibration (Table 1). Using loci that conflict with the enforced calibration constraint could  
236 lead to biased results (Yang and Rannala 2006). The third data subset consisted of all UCE loci with low  
237 variation in GC content among taxa. Increased variance in GC content among taxa is often a signal of



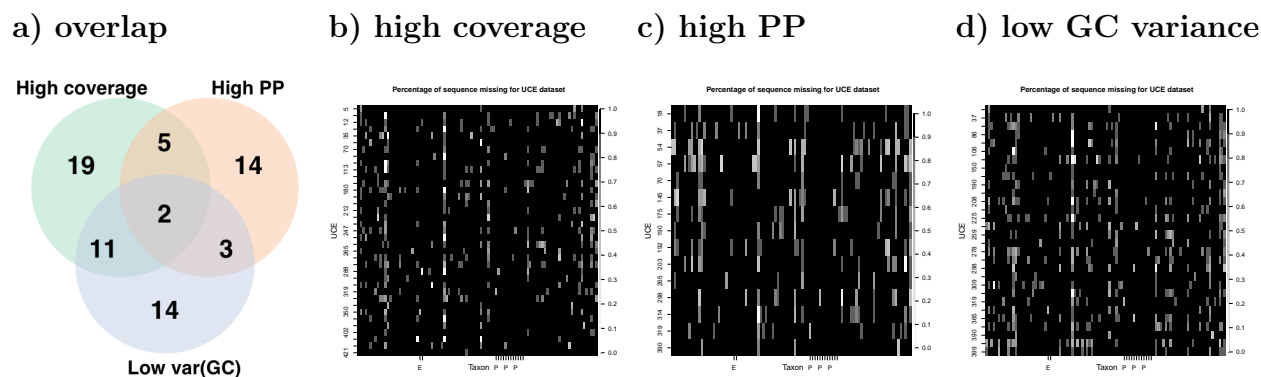

**Figure 1: Overlap and completeness of the AHE data subsets.** We selected three data subset based on (b) loci with on average 95% completeness (high coverage), (c) loci with a high posterior probability of *Photinus* being monophyletic (high PP), and (d) loci with low variance in GC content. (a) shows the overlap between data subsets. Despite there being some overlap between the data subsets, the majority of loci is private to each subset. (b–d) shows the completeness of the selected loci. We computed the percentage of sites missing per sequence. Black cells depict complete sequences and white cells depict entirely missing sequence. The gray shades depict the percentage in between. Each row represents one of the AHE loci and each column represent one taxon.

238 compositional heterogeneity which is not modeled appropriately using standard phylogenetic substitution  
 239 models (*e.g.*, GTR+ $\Gamma$ ) and can lead to wrong phylogenetic inferences (Foster 2004; Romiguier et al. 2013;  
 240 Duchêne et al. 2017). The data subsets contained 37, 24 and 30 AHE loci for the high sequence coverage,  
 241 *Photinus* monophyly, and low GC variance criteria respectively. These data subsets share some loci but the  
 242 majority of loci are private for each data subset (Figure 1). Overall, the data subset include loci with rather  
 243 higher sequence coverage, *i.e.*, fewer missing sites (Figures 1), compared with the full dataset (Figure S1).  
 244 Thus, our divergence time analyses using these three different data subsets are mainly independent. If all  
 245 three datasets produce the same or highly similar divergence time estimates, then we are confident that  
 246 these data subsets are representative for the whole AHE dataset and that the divergence time estimates are  
 247 robust to our choice of data subsets.

248 For each data subset we employed a partitioned GTR+ $\Gamma$  substitution model (Tavaré 1986) where among  
 249 site rate variation was modeled by 4 discrete categories obtained from a gamma distribution (Yang 1994). We  
 250 did not perform any substitution model selection (*e.g.*, Tagliacollo and Lanfear 2018) as Bayesian inference  
 251 is robust to substitution model over-parametrization (Huelsenbeck and Rannala 2004; Lemmon and Moriarty  
 252 2004; Abadi et al. 2019). Thus, our chosen substitution model is conservative albeit computationally more  
 253 demanding because it assigns each partitions its own set of substitution model parameters. We applied  
 254 standard prior distributions for the substitution model parameters, that is, a flat Dirichlet prior distributions  
 255 on both the stationary frequencies and on the exchangeability rates (Höhna et al. 2017). Furthermore,  
 256 to account for rate variation among lineages we used a relaxed-clock model with uncorrelated lognormal  
 257 distributed rates (UCLN, Drummond et al. 2006). We applied an uninformative hyperprior distribution on  
 258 both the mean  $\sim$  uniform(0, 100) and standard deviation,  $sd \sim$  uniform(0,100) of the branch-specific clock  
 259 rates.

260 Estimating a dated phylogeny of most insect clades is extremely challenging because of the lack of  
 261 appropriate fossils for node calibrations. We found five fossil taxa belonging to different genera within

**Table 1: Fossils and calibration constraints for the time-calibrated divergence time analysis.**

| Fossil taxon                     | Max age (MA) | Min age (Ma) | Reference        | Monophyletic clade constraint                                                                                                                                                                                                                                                                                                                                                                                             |
|----------------------------------|--------------|--------------|------------------|---------------------------------------------------------------------------------------------------------------------------------------------------------------------------------------------------------------------------------------------------------------------------------------------------------------------------------------------------------------------------------------------------------------------------|
| † <i>Lampyrus orciluca</i>       | 12.7         | 11.608       | Heer (1865)      | † <i>Lampyrus orciluca</i> , <i>Lampyrus noctiluca</i>                                                                                                                                                                                                                                                                                                                                                                    |
| † <i>Lamprohiza fossilis</i>     | 28.4         | 23.03        | Kazantsev (2012) | † <i>Lamprohiza fossilis</i> , <i>Lamprohiza splendidula</i>                                                                                                                                                                                                                                                                                                                                                              |
| † <i>Electrotreta rasnitsyni</i> | 37.2         | 33.9         | Kazantsev (2012) | † <i>Electrotreta rasnitsyni</i> , <i>Drilaster sp.</i> , <i>Stenocladus shirakii</i>                                                                                                                                                                                                                                                                                                                                     |
| † <i>Lucidota prima</i>          | 37.2         | 33.9         | Wickham (1912)   | † <i>Lucidota prima</i> , <i>Lucidota atra</i>                                                                                                                                                                                                                                                                                                                                                                            |
| † <i>Photinus kazantsevi</i>     | 37.2         | 33.9         | Alekseev (2019)  | † <i>Photinus kazantsevi</i> , <i>Photinus sp 1</i> , <i>Photinus sp 2</i> , <i>Photinus floridanus</i> , <i>Photinus macdermotti 2</i> , <i>Photinus stellaris</i> , <i>Photinus ardens</i> , <i>Photinus carolinus</i> , <i>Photinus pyralis</i> , <i>Ellychnia sp.</i> , <i>Ellychnia corrusca</i> , <i>Photinus macdermotti 1</i> , <i>Photinus granulatus</i> , <i>Photinus australis</i> , <i>Photinus brimleyi</i> |

Lampyridae (Table 1). We included the recently published fossil for the *Photinus* clade; †*Photinus Kazantsevi* found in Baltic amber and dated to the Upper or Mid-Eocene (33.9 to 47.8 ma Alekseev 2019). However, the taxonomic placement of this fossil specimen is unknown, *i.e.*, whether this fossil represent a stem or crown fossil, or might even be wrongly described as belonging to *Photinus*. To explore the sensitivity of our fossil calibrations and divergence time analyses, we performed each divergence time analyses for the three data subsets twice; once including †*Photinus Kazantsevi* and enforcing *Photinus* to be monophyletic and the other time excluding †*Photinus Kazantsevi*. This sensitivity analysis provides both insights into the robustness of the divergence time analysis when a fossil is excluded (Near and Sanderson 2004; Saladin et al. 2017) and the placement of †*Photinus Kazantsevi*.

We also omitted using the fossil †*Electrotreta rasnitsyni* because our preliminary analyses showed that *Drilaster sp* and *Stenocladus shirakii* were not recovered as sister species (see also Martin et al. 2019). We did not want to enforce the sister relationship between *Drilaster sp* and *Stenocladus shirakii* because this could bias the phylogeny inference.

We used the fossilized birth-death-range process (Stadler et al. 2018) to time-calibrate the Lampyridae phylogeny. The fossilized birth-death range process requires assignment of fossils to clades (see Table 1) and integrates over both the actual placement within the clade (*e.g.*, stem vs crown) and the actual time of fossil within the specified stratigraphic range. That is, we provided both minimum and maximum ages (Table 1) for each fossil taxon. Then, the fossilized birth-death range process gives equal probability that the true age of the fossil was within the specified range. In principle, we could omit the monophyletic constraints if we had morphological data for both fossil and extant taxa using tip-dating approaches (Ronquist et al. 2012; Arcila et al. 2015; Gavryushkina et al. 2017). Unfortunately, there does not exist an appropriate morphological dataset for fossil and extant Lampyridae which prohibits tip-dating approaches.

Estimating the divergence times under a relaxed-clock model is extremely challenging because of the non-identifiability between evolutionary rates and time (Donoghue and Yang 2016). We used a newly developed MCMC move, the *RateAgeBetaShift*, to alleviate the problem of highly correlated parameter estimates (Zhang and Drummond 2020). Additionally, we performed 12 independent Metropolis-Coupled MCMC (MCMCMC, Altekar et al. 2004) runs with one cold and seven heated chains for 50,000 iterations (with on average 458 moves per iteration). Each single MCMCMC replicate took up  $\sim 1,111$ ,  $\sim 618$  and  $\sim 956$

290 hours (for the three data subsets respectively) using 8 CPUs simultaneously with a total of  $\sim 515,710$  CPU  
291 hours ( $\sim 21,487.93$  CPU days or  $\sim 58.87$  CPU years). This high computational cost using only 24 to 37  
292 loci demonstrates that it is computationally unfeasible to perform joint Bayesian divergence time analyses  
293 using all 436 loci.

## 294 RESULTS

### 295 *Properties of the AHE loci*

296 We obtained a minimum of 218 variable sites and a maximum of 2,071 variable sites with a mean of 696  
297 variable sites (Figure 4 and S2). Similarly, we obtained a minimum of 23 invariable sites, a maximum of of  
298 1067 invariable sites and a mean of 225 invariable sites. We used the number of variable sites as a proxy  
299 for how informative a locus is (Townsend 2007). Overall, the distribution of the number of variable sites  
300 appeared unimodal without extremely low outliers. Thus, we did not see any indication that specific loci  
301 should be particularly poor for phylogenetic inference.

302 The minimum and maximum pairwise distance showed interesting patterns. The majority of loci had  
303 a minimum pairwise distance of zero (Figure 4 and S2), which means that the alignments contained two  
304 sequences without substitutions among them. Hence, there is no phylogenetic signal to distinguish between  
305 the sequences. In itself, this low pairwise distance does not imply a problem for phylogenetic inference  
306 because the two taxa will be placed as sister taxa. However, this distribution could indicate that there are  
307 several taxa that cannot be resolved.

308 The maximum pairwise distance showed a skewed distribution with some larger outliers. This could  
309 indeed be problematic. First, the high maximum pairwise distance will most likely lead to long branches in  
310 the phylogeny. Second, the high distance could occur due to non-homologous sequences. The sequences, for  
311 example, could be contaminated, mis-aligned and/or represent paralogs.

312 The distribution of GC content showed some slightly multi-modal and skewed mean GC content and  
313 variance in GC content (Figure 4 and S2). The mode with lower mean GC content and higher variance in  
314 GC content could represent loci which are problematic for phylogenetic inference.

### 315 *Gene trees*

316 *Posterior probabilities of named clades*— Our single loci (gene trees) phylogenetic analyses yielded very  
317 mixed results (Figure 2 and S3). On a subfamily level, monophyly of Lampyrinae and Amydetinae was  
318 rejected by all 436 loci, whereas the monophyly of Luciolinae and Photurinae was rejected by the majority  
319 of loci (Figure S3). The monophyly of Ototretinae was ambiguously supported and the Lamprohizinae was  
320 the only subfamily which we recovered as monophyletic. The results on a tribe level were similar; either all  
321 or the majority of loci rejected the monophyly of all six tribes (Cratomorphini, Lamprocerini, Lampyrini,  
322 Photinini, Phosphaenini and Luciolini). The monophyletic support increased on the genus level; eight of

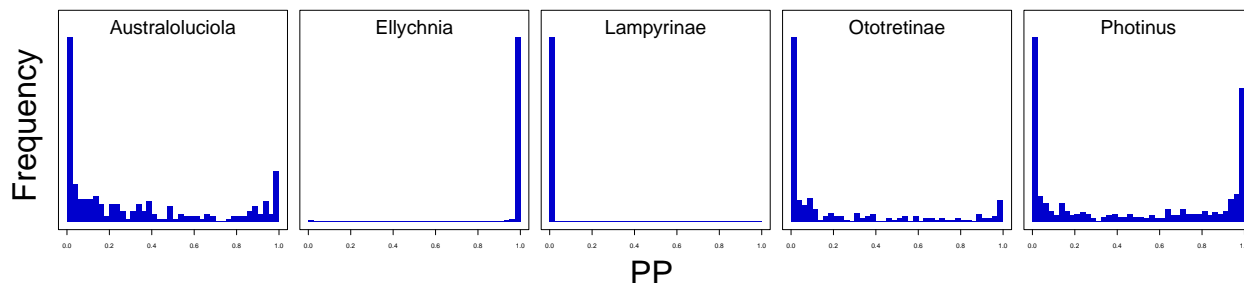

**Figure 2: Posterior probability of being monophyletic per AHE locus for five example clades.** For each AHE locus, we computed the posterior probability that the clade is monophyletic. A histogram with most loci having a high posterior probability (*e.g.*, *Ellychnia*) depicts strong support by the majority of AHE loci. Conversely, a histogram with most loci having a low posterior probability (*e.g.*, *Ototretinae*) depicts strong support against monophyly by the majority of AHE loci. Other clades (*e.g.*, *Photinus*) received contradicting support with some loci strongly supporting and other loci strongly rejecting monophyly. The histograms for all clades is shown in the supplementary material.

323 the fourteen genera were recovered as monophyletic, five genera were rejected as being monophyletic and  
324 *Australoluciola* was ambiguously recovered as either monophyletic or not (Figure S3).

325 *Correlation between missing data and posterior support*— Given the poor support on higher taxonomic  
326 levels, and the ambiguous support for some of the named clades, we investigated whether there is a correlation  
327 between missing data and phylogenetic accuracy. Here, we associate phylogenetic accuracy with the ability  
328 to recover monophyly of an established clade. Specifically, we used the posterior probability of *Photinus*  
329 being monophyletic. We focus here on *Photinus* because it is a well studied genus whose monophyly is  
330 not debated (Stanger-Hall et al. 2007; Lower et al. 2017; Martin et al. 2019) although we observed rather  
331 ambiguous support (Figure 2). The same investigation for all named clades is shown in the Supplementary  
332 Material Figure S4.

333 We observed that there is no correlation between sequence coverage and the posterior probability of *Phot-*  
334 *inus* being monophyletic (Figure S4). This results is actually expected because we removed taxa which had  
335 50% or more sites in the sequence missing. The overall sequence coverage instead represents the completeness  
336 of the entire alignment and therefore loci with higher average sequence coverage are loci that contain more  
337 taxa after pruning. The same trend and correlation between sequence coverage and phylogenetic accuracy  
338 can be seen for all other tested clades (Figures S4). Thus, our pruning of incomplete sequences from the  
339 alignment makes filtering loci based on overall sequence coverage futile.

340 *Correlation between summary statistics of the data and posterior support*— Next to the sequence complete-  
341 ness of a loci, other summary statistics of the data could provide good indicators about the quality and  
342 usefulness of a locus (phylogenetic accuracy). Again, we used the ability to recover monophyly of the clade  
343 *Photinus* as a predictor for phylogenetic accuracy. We compared several summary statistics to the posterior  
344 probability of *Photinus* being monophyletic (Figure 3, green dots and green dashed line). Instead of seeing  
345 clear trends (*i.e.*, monotonously increasing or decreasing correlations), we observed unimodal correlation  
346 (*e.g.*, for the number of invariant sites). That means that outlier loci with extreme values for the summary  
347 statistics produce lower phylogenetic accuracy (*e.g.*, number of invariant sites, minimum GC content and

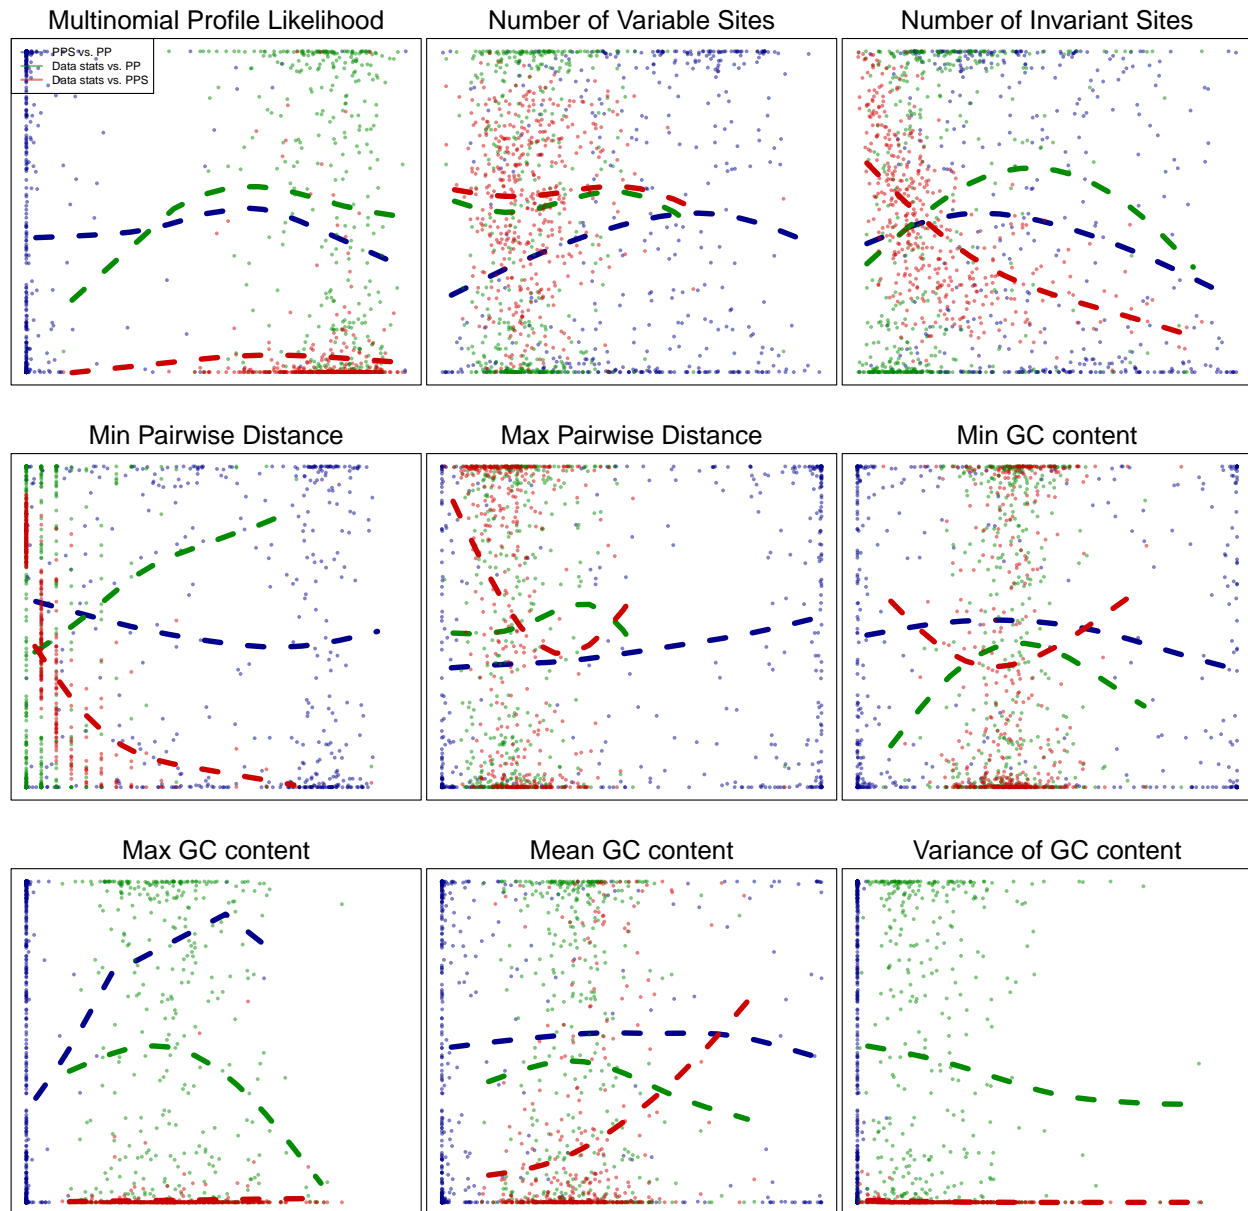

**Figure 3: Comparison between phylogenetic accuracy (i.e., posterior probability of the clade *Photinus* being monophyletic), model adequacy (i.e., posterior predictive p-values) and data summary statistics obtained for the AHE dataset of Martin et al. (2019).** In blue we show the comparison between posterior predictive p-values (x-axis) and the posterior probability of *Photinus* being monophyletic (y-axis). In green we show the comparison between data summary statistics (x-axis) and the posterior probability of *Photinus* being monophyletic (y-axis). In red we show the comparison between data summary statistics (x-axis) and posterior predictive p-values (y-axis). The dashed lines represent smoothed spline function of the corresponding comparisons. We observe that there is no correlation between model adequacy (posterior predictive p-values) and the posterior probability of *Photinus* being monophyletic (blue line). Interestingly, we observe some correlation between data summary statistics and model adequacy (red line). For each AHE locus, we computed the posterior probability that the clade *Photinus* is monophyletic. In the supplementary material we show each comparison separately.

348 maximum GC content). Only for the minimum pairwise distance and the variance in GC content did we  
349 observe a positive correlation (and negative correlation, respectively) with phylogenetic accuracy. A nega-  
350 tive correlation between the variance in GC content and phylogenetic accuracy is expected because a low  
351 variance in GC content corresponds to more homogeneous substitution processes which are easier to model  
352 and produce less biased phylogenetic estimates (Foster 2004).

353 *Model adequacy*— Our posterior predictive simulations showed clear model violations for all loci (Figure 5  
354 and S9). No single locus passed all eight posterior predictive checks using a significance level of  $\alpha = 0.05$ .  
355 Thus, based on our pipeline and our model adequacy checks, we do not have an appropriate phylogenetic  
356 model for a single locus. All of our gene tree estimates could be biased due to model violations. If we would  
357 filter our original dataset based on which locus passed all model adequacy checks, then we would be left  
358 without any locus to proceed further.

359 The minimum, maximum, mean and variance of GC content is more difficult to interpret with regards to  
360 our phylogenetic model. The minimum GC content of the posterior predictive datasets was too low (posterior  
361 predictive p-value close to 0.0) or too high (posterior predictive p-value close to 1.0) for the majority of loci.  
362 Since our phylogenetic substitution model assumes a homogeneous process with all sequences having the  
363 same stationary distribution (*i.e.*, same expected GC content), it is possible that we do not correctly model  
364 outliers sequences with either high or low GC content. This hypothesis corroborated that our posterior  
365 predictive datasets have too low variance in GC content (Figure ??, posterior predictive p-value close to  
366 0.0). Nevertheless, it is unexpected that our posterior predictive datasets have too low mean GC content.  
367 The mean GC content should be modeled accurately by the stationary distribution of the substitution  
368 process.

369 We observed no clear correlation between the posterior predictive p-value and the gene tree estimation  
370 accuracy (when assuming monophyly of *Photinus* as a proxy for gene tree accuracy, Figure ?? blue dots  
371 and dashed blue line). However, we observed a negative correlation between several summary statistics and  
372 posterior predictive p-values (Figure ?? red dots and dashed red line). This indicates that large summary  
373 statistics are likely to be outliers which we cannot model adequately. For example, a high minimum or  
374 maximum pairwise distance could be alignment errors and removing these loci could improve phylogenetic  
375 inference.

### 376 *Simulation Study*

377 In our simulation study, we simulated 12 sets of 436 loci under different conditions. The motivation of the  
378 simulation study was to establish (1) how much gene tree error is realistic, (2) the impact of missing sequence  
379 data on phylogeny inference and model adequacy testing, and (3) the impact of unequal distribution of fast  
380 versus slow evolving sites in combination with missing sequence data on phylogeny inference and model  
381 adequacy testing.

382 First, we observed that simulated complete alignments had different distributions of summary statistics  
383 compared to the empirical data. Interestingly, when we masked the alignments to mimic the distribution  
384 of missing sequence data as in the original AHE dataset, then we obtained comparable summary statistics.

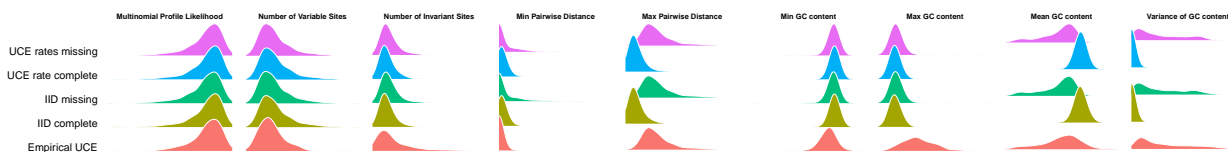

**Figure 4: Summary statistics of the empirical AHE datasets and simulated datasets.** The top row shows the summary statistics computed for the simulated dataset with missing sequences and systematically distributed highly variable sites. The second row shows the summary statistics computed for the simulated dataset with complete sequences and systematically distributed (*i.e.*, akin to the empirical AHE dataset) highly variables sites. The third row shows the summary statistics computed for the simulated dataset with missing sequences and homogeneous highly variable sites. The fourth row shows the summary statistics computed for the simulated dataset with complete sequences and homogeneous (*i.e.*, independent and identically distributed, IID) highly variables sites. The bottom row shows the summary statistics computed for the empirical dataset of Martin et al. (2019). The simulated datasets show similar distributions to the empirical dataset only if missing sequences were considered. The distribution of highly variables versus conserved sites had little to no impact on the summary statistics.

385 Specifically, the distribution of minimum and maximum pairwise distance matched the empirical distribution  
 386 only if we removed sites distributed exactly as in the empirical dataset. Similarly, the distribution of mean  
 387 and variance of GC content matched between simulated dataset and empirical dataset only if we removed  
 388 sites distributed exactly as in the empirical dataset. Thus, the observed variance in GC content from the  
 389 empirical data could be a bias observed due to the missing data. However, the distribution of maximum  
 390 and minimum GC content are wider for the empirical data than for the simulated data. Therefore, not all  
 391 aspects of the empirical data could be explained solely due to missing data. Furthermore, the systematic  
 392 distribution of highly variable sites at the beginning and end of the sequences compared with the conserved  
 393 regions in the center did not impact the computed summary statistics.

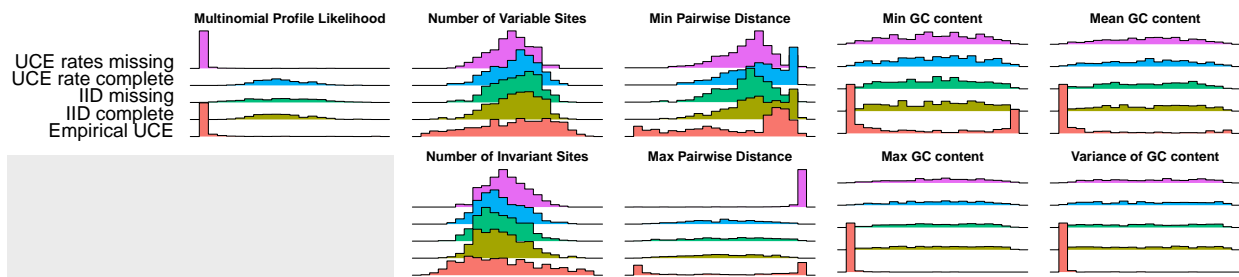

**Figure 5: Posterior predictive p-values for the empirical and simulated datasets.** The top row shows the frequency of posterior predictive p-values for the empirical dataset of Martin et al. (2019). The second row shows the posterior predictive p-values for the simulated dataset with complete sequences and homogeneous (*i.e.*, independent and identically distributed, IID) highly variables sites. The third row shows the posterior predictive p-values for the simulated dataset with missing sequences and homogeneous highly variable sites. The fourth row shows the posterior predictive p-values for the simulated dataset with complete sequences and systematically distributed (*i.e.*, akin to the empirical UCE dataset) highly variables sites. The fifth row shows the posterior predictive p-values for the simulated dataset with missing sequences and systematically distributed highly variable sites. The empirical dataset has mostly posterior predictive p-values of either 0.0 or 1.0, indicating model violation and inadequacy. Conversely, non of the simulated datasets showed model violations as the model used for simulation and inference was identical. Missing data did not impact the posterior predictive p-values and thus the computation of the summary statistics in a systematically biased way.

394 Our posterior predictive simulations using the simulated data showed that our phylogenetic model was  
 395 adequate, except in the case when the data were simulated with highly variable sites at the ends of the  
 396 alignment and sites missing from the alignments. This result is not surprising because the model used for  
 397 simulation and inference matched but instead very reassuring that our implementation of the models is

indeed correct. Furthermore, our results imply that missing data, even when distributed in a systematic manner, do bias our posterior predictive p-values and model adequacy tests. The only exception was when using the the multinomial likelihood and the maximum pairwise distance for the simulated data with the combination of systematically ordered highly variables sites at the borders and missing sequence data. It remains therefore surprising that our phylogenetic substitution model was not adequate for even a single empirical locus.

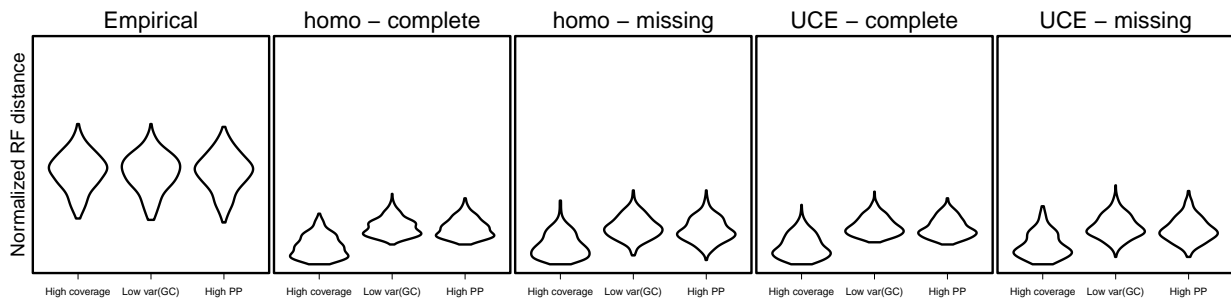

**Figure 6: Gene tree discordance measured using the normalized Robinson-Foulds (RF) distance between several reference trees and the single gene trees.** As reference trees, we used the the maximum a posteriori (MAP) phylogeny using the three different data subsets (high coverage, low variance in GC content, and high posterior probability of *Photinus* being monophyletic). The left panel shows the frequency of the RF-distance for the empirical dataset of Martin et al. (2019). The second panel shows the RF-distance for the simulated dataset with complete sequences and homogeneous (*i.e.*, independent and identically distributed, IID) highly variables sites. The third panel shows the RF-distance for the simulated dataset with missing sequences and homogeneous highly variable sites. The fourth panel shows the RF-distance for the simulated dataset with complete sequences and systematically distributed (*i.e.*, akin to the empirical UCE dataset) highly variables sites. The right panel shows the RF-distance for the simulated dataset with missing sequences and systematically distributed highly variable sites. Neither of our simulation conditions are a strongly negative impact on gene tree discordance.

We observed an unexpected amount of gene tree discordance between our species tree and the gene trees (Figure 6). The RF-distance computed for the empirical dataset are more centered at intermediate values and never close to 0. That means, not a single gene tree was equal to or close to any of our reference trees. Using the simulated data as a reference predicts that we should observe more often gene trees that are similar to the species tree. It remains elusive to what reason is causing this unexpected gene tree discordance.

### *Time-Calibrated Lampyridae Phylogeny*

*Topology of Lampyridae*— The support for the named clades using the three concatenated data subsets largely matches the support from the single gene tree analyses (Figure 2 and S12). The concatenated analyses inferred trees with extremely high support; the posterior probabilities of the named clades were either 0.0 or 1.0. This strong support could be inflated posterior probabilities instead of true signal. The selected four MCMC replicates show identical posterior probabilities, indicating convergence of the MCMC analyses.

The most interesting results are obtained for the clade that received ambiguous support from the single gene trees: *Photinus*, *Australoluciola* and Otoretinae. It is expected that we received high posterior support for *Photinus* being monophyletic for the data subset with the loci support *Photinus* monophyly with at least 0.95 posterior probability. Reassuringly, the other two data subsets also recovered *Photinus* to be monophyletic. It is therefore most probable that *Photinus* is indeed monophyletic and the single gene



tree results are driven by missing data (see results of the simulation study above). Note that we defined the clade *Photinus* to include *Ellychnia* in the computation of the posterior probability for monophyly. In all our analysis we recovered both *Ellychnia* itself being monophyletic and *Photinus* + *Ellychnia* being monophyletic, indicating that *Photinus* is paraphyletic (Figure 7). The inclusion of *Ellychnia* within *Photinus* has been reported previously (Stanger-Hall et al. 2007; Stanger-Hall and Lloyd 2015; Martin et al. 2019) and has led Zaragoza-Caballero et al. (2020) to change *Ellychnia* to *Photinus*.

All three data subsets agreed that *Australoluciola* is not monophyletic. In the UCE dataset from Martin et al. (2019) there are only two species belonging to *Australoluciola* (see Table S1). Our inferred results show *Australoluciola* being paraphyletic with *Pteroptyx sp* and *Trisinuata sp* nested within, agreeing with previous results by Jusoh et al. (2018). Otoretinae also consisted of only two species (*Drilaster sp* and *Stenocladius shirakii*) in the AHE dataset by Martin et al. (2019). Otoretinae was inferred to be monophyletic using the *Photinus* 0.95 posterior probability data subset, but was not found to be monophyletic using the other two data subsets (Figure S12).

**Table 2: Fossils and calibration constraints for the time-calibrated divergence time analysis.**

| Study                 | Age (MA)               | Data                                            | Method                                                               |
|-----------------------|------------------------|-------------------------------------------------|----------------------------------------------------------------------|
| McKenna et al. (2015) | 78                     | 4 Lampyridae species, eight nuclear genes       | BEAST with 15 node-calibrations                                      |
| Bocak et al. (2016)   | 130 (120-145)          | 2 Lampyridae species, 13 mtDNA genes            | BEAST with 2 node calibrations                                       |
| Kusy et al. (2018)    | 80 (60–97)             | 8-gene dataset with 4 Lampyridae species        | BEAST with 2 node-calibrations                                       |
| Amaral et al. (2019)  | 71.9 (57.9–85.6)       | 13 Lampyridae species, 100 amino acid sequences | BEAST with 2 node-calibrations                                       |
| McKenna et al. (2019) | 90 (60–110)            | 2 Lampyridae species, 4,818 genes               | MCMCTree with 18 node calibrations                                   |
| Zhang et al. (2020)   | 100 (74.38–129.33)     | 5 Lampyridae species, 531 genes                 | MCMCTree with 2 node calibrations                                    |
| This study            | 139.85 (108.43–165.68) | 37, 24 and 30 AHE loci                          | RevBayes using the fossilized birth-death process with 4 fossil taxa |

*Divergence Times of Lampyridae*— We inferred a time-calibrated phylogeny of Lampyridae. Our estimate of the crown age of Lampyridae is 139.85 Ma with a 95% credible of [108.43, 165.68]. Our estimated crown age is older than most previous estimates (Table 2). Toussaint et al. (2017) showed that previous divergence time estimates of McKenna et al. (2015) are likely underestimates. Specifically, McKenna et al. (2015) estimated a crown age of Elateroidea of 166.18 (151.83–181.57) while Toussaint et al. (2017) estimated a crown age of 246.02 (231.35–260.12).

Most previous analyses used only very few Lampyridae species (up to five species) which could possibly bias crown age estimates if the true crown group was not sampled. Furthermore, most previous studies should not be considered as independent evidence, as for example Zhang et al. (2020) uses divergence times for calibrations which were estimated by Zhang et al. (2018).

Our divergence times are robust for the majority of clades when comparing the three different data subsets (Figure S13). If the clades were identified as being monophyletic for all three data subsets (Figure S12), then also the estimated crown ages were identical (Figure S13). However, when the clades were not found to be

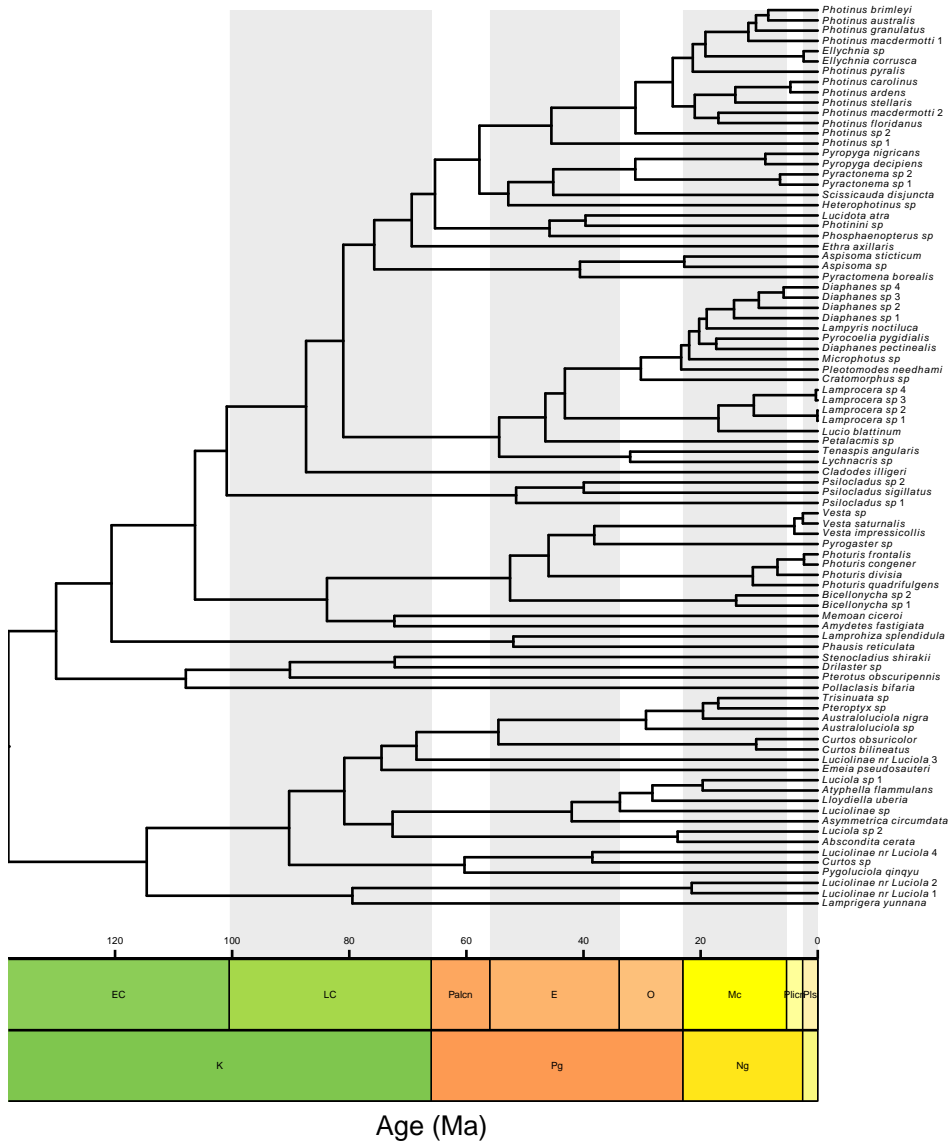

**Figure 7: Time-calibrated phylogeny of Lampyridae.** Estimated time-calibrated lampyridae phylogeny under the fossilized birth-death-range process using the high posterior probability of *Photinus* being monophyletic data subset.

447 monophyletic, then the clade ages also differed (*e.g.*, Otoretinae). This result is not surprising as the crown  
448 age is defined as the most recent common ancestor for the selected taxa, and if this most recent common  
449 ancestor includes different species then the interpretation of this ancestor and its age should be different.

450 Our sensitivity analysis of including and excluding the recently published *Photinus* fossil, †*Photinus*  
451 *kazantsevi* (Alekseev 2019), yielded largely identical results (Figure 8). †*Photinus kazantsevi* was dated to  
452 be 33.9 to 37.2 million years old. Our estimated crown age of *Photinus* was between 32 and 63 Ma, including  
453 and excluding †*Photinus kazantsevi*. This result gives us confidence that †*Photinus kazantsevi* can be used  
454 to calibrate the crown age of *Photinus*.

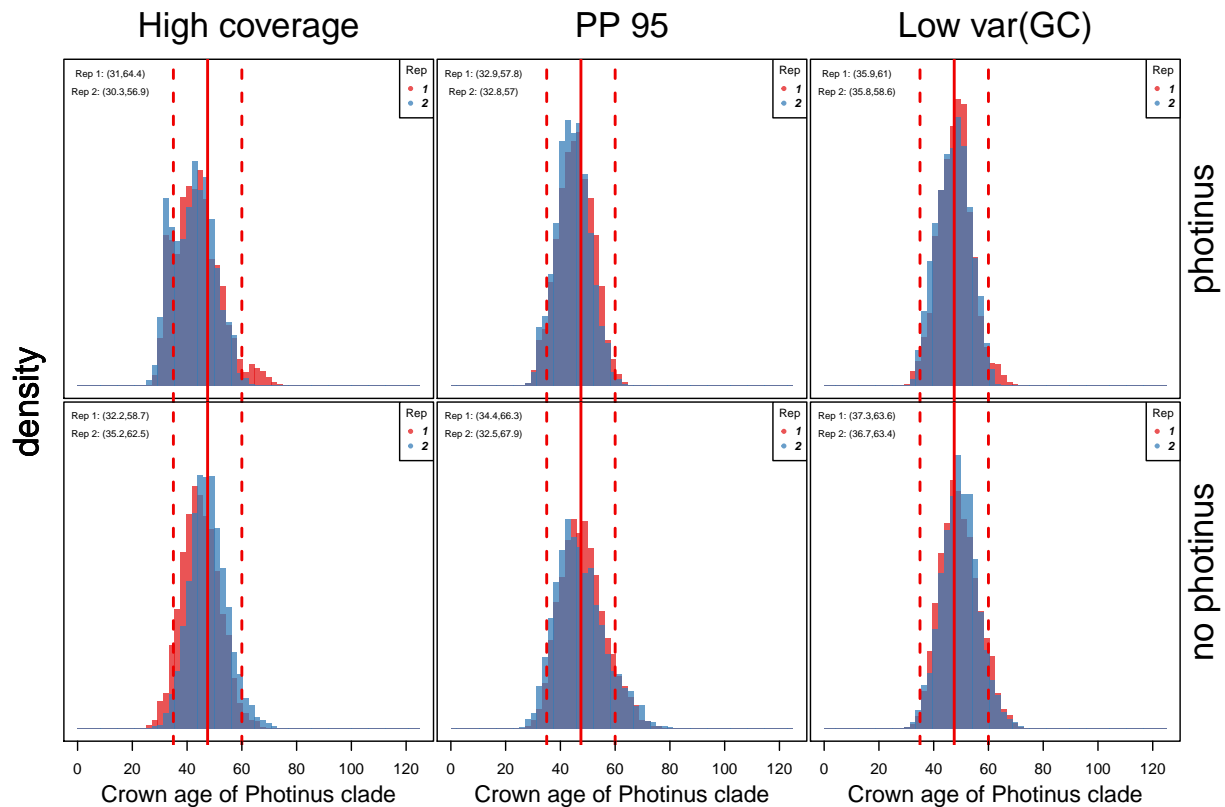

**Figure 8: Estimated crown age of *Photinus*.** We show the crown age of the *Photinus* clade for the three data subsets with (top row) and without (bottom row) using the †*Photinus kazantsevi*. First, we observe that the data subset has little impact on the estimated *Photinus* crown age. Second, the usage of †*Photinus kazantsevi* does not significantly impact the *Photinus* crown age estimate, which corroborates the †*Photinus kazantsevi* placement and *Photinus* crown age.

## DISCUSSION

### *Divergence time estimation using genomic data*

The objective of this study was to estimate a time-calibrated phylogeny of fireflies using genomic data. The computational demand was extremely high prohibiting the full use of the 436 loci combined with adequate full-likelihood Bayesian divergence time estimation methods (*e.g.*, adequately partitioned substitution model, relaxed clock model and fossilized birth-death process). Even when we used a smaller subset of the data, *i.e.*, 24 to 37 loci, the computational demand was still high (several weeks to months for a single analysis) but manageable. Until faster methods are available, we can only resort to using a subset of data if we wish to use full-likelihood methods for divergence time estimation. However, until now, there are no clear guidelines on how to select the best data subset for divergence time estimation. Here, we constructed three data subsets and explored several characteristic of the data but failed to find a clear correlation to phylogenetic accuracy.

First, we observed that our inferred phylogenies from the three data subsets are mostly identical. That means that different data subset can converge on the same phylogeny and this could indicate support that the inferred phylogeny is robust. Other studies had shown that different data sources (*e.g.*, exons, ultra conserved elements and transcriptomic sequences) yield different phylogenies, *e.g.*, Betancur-R et al. (2019). In our study with used the same data source but different data subset. Thus, the difference in results of phylogenomic studies could originate rather from the data source than the amount of data.

Second, divergence time estimates seem robust to the chosen data subset if the inferred topology agreed. It is not surprising that a clade, which was inferred to be monophyletic for one data subset but not for another data subset, obtained a different crown age estimate (*e.g.*, Otoretinae). Therefore, we conclude that it is more important to focus first on robust estimation of phylogeny using different data subset. Once we understand how to select data subsets to produce reliable phylogenies, then we can safely use the same data subsets for divergence time estimation. Our study raises some important aspects where we need to improve our inference of phylogeny.

### *Unrealistic gene tree discordance*

Our analyses of the 436 AHE loci revealed strong gene tree discordance. Such large amounts of gene tree discordance are not expected even when allowing for incomplete lineage sorting. Richards et al. (2018) showed that discordance between mitochondrial loci and nuclear loci is equally large, suggesting that much of the apparent gene tree discordance originates from methodical factors and biological factors. Our simulation study corroborates these findings: we cannot explain the observed gene tree discordance with incomplete lineage sorting or phylogenetic uncertainty.

In our analyses, we did not clean the AHE dataset but took the data as given. There are several possible sources of error which we did not check. For example, we did not assess orthology and did not check for alignment errors. However, the AHE dataset was curated following current best practices and therefore should reflect the state of the field.

In the last decade, we have seen several debates about using concatenation or coalescent-based species

491 tree approaches (for a recent review see Bravo et al. 2019). Our observed higher accuracy of the concatenated  
492 analyses over the single gene trees is surprising and provides empirical evidence against standard theoret-  
493 ical expectations. We expect that there is recombination between loci and therefore that concatenation  
494 approaches can be misleading (Degnan and Rosenberg 2009). Instead, we find that the information within  
495 single loci is misleading and, when concatenated, the noise is canceled out to leave the true phylogenetic  
496 signal. We do not advocate that concatenation approaches are philosophically or theoretically superior,  
497 but instead we notice that current single gene tree estimation methods are plagued by high gene tree error  
498 (Bossert et al. 2021) and thus strong empirical violation of the assumptions of the multispecies coalescent  
499 process Reid et al. (2014). We need to understand and alleviate the gene tree error before we can con-  
500 tinue with the debate on coalescent-based species tree approaches. Finally, even if both concatenation and  
501 summary-based multispecies coalescent approach show robust to noise in single gene tree estimates (Mol-  
502 loy and Warnow 2018), noise in single gene tree estimates are highly problematic when used for ancient  
503 population size estimation and inference of gene flow (Kutschera et al. 2014).

#### 504 *Filtering loci*

505 Previous studies have shown that loci can be filtered to increase phylogenetic accuracy (*e.g.*, Alda et al.  
506 2019). However, previous studies mainly focused on the resulting species tree and not on the single genes  
507 (*e.g.*, Leite et al. 2021). Overall, we could not identify a single summary statistics as a reliable predictor for  
508 phylogenetic accuracy (Figure 3). Thus, we could not use single summary statistics as data filtering criteria  
509 for robust phylogenetic inference. It is possible that some phylogenetic relationships of Lampyridae require  
510 revision and thus our proxies of phylogenetic accuracy are misleading. Clearly more work is needed if these  
511 summary statistics of the data are used for selecting data subsets. Our results show some promise and single  
512 summary statistics could be used to detect outliers which are then removed to clean the dataset (Figure 3).  
513 Additionally, a combination of summary statistics might provide a fruitful future approach.

#### 514 *Posterior predictive simulations*

515 Posterior predictive distributions to test model adequacy have not been routinely applied in phylogenomic  
516 studies (Brown and Thomson 2018). If a model is not adequate for a given dataset, then we cannot guar-  
517 antee the accuracy and robustness of the estimates. With genomic data, our hope is that for some loci we  
518 have adequate phylogenetic substitution models while for other loci we do not. Such a result would allow us  
519 to proceed with the subset of loci that we can model adequately. Unfortunately, our results show that we  
520 do not have adequate phylogenetic substitution models for any of the 436 AHE loci. This fact should not  
521 be downplayed and we direly need more accurate substitution models. First, we need to develop a better  
522 understanding of posterior predictive distribution and the expected behavior under simulations. Second, we  
523 need more and better summary statistics that will guide us in the development of more accurate phyloge-  
524 netic substitution models. Third, we need to adopt our standard phylogenetic pipelines to include more  
525 complex substitution models, for example, within-locus partitioning (Freitas et al. 2021), site-heterogeneous  
526 substitution models (Lartillot et al. 2007; Wu et al. 2013) and Markov modulate Markov model (Baele et al.

527 2021). Then, we should revisit both the gene tree accuracy as well as gene tree model adequacy. Until  
528 then, we cannot say with confidence why we observe so much gene tree discordance, whether biological or  
529 methodological.

530 *Missing data and summary statistics*— We investigated here if missing sequence data is a problem for  
531 phylogenetic inference. In theory, missing sequence data does not pose a problem if sufficient information  
532 is retained (Philippe et al. 2004). Imagine that we would add another column to our data matrix but this  
533 column consists only of missing sites. In that case, we have not added any information to our data and in  
534 fact the likelihood function remains the same after adding this column of missing data (Felsenstein 2004).  
535 Hence, missing data in itself is not problematic.

536 Previous studies have investigated the impact of missing data using simulation studies (Philippe et al.  
537 2004; Wiens 2003). A challenge to evaluate missing data is how the missing data is distributed. If we  
538 randomly place missing data in the data matrix, then this has only a minor impact on our ability to  
539 correctly infer the true phylogeny. Here we used an empirically informed approach and removed sites using  
540 the same positions as in the original data matrix (see Supplementary Figures XXX). In our simulations it  
541 occurred that complete sequences were missing and certain regions (the boundary of the sequences) have  
542 higher prevalence of missing data. This uneven distribution of missing data has the effect that some taxa  
543 cannot be placed accurately and the entire gene tree is erroneous. Therefore, it was necessary to remove  
544 taxa for a locus with too few non-missing sites, *e.g.*, we removed taxa with fewer than 50% sites.

545 Our simulations and results confirm theoretical expectations that missing sites do not bias phylogenetic  
546 inference (Figure 6). However, we observed that missing sites to bias distributions of summary statistics  
547 (Figure 4) and a non-uniform distribution of highly variable sites together with a non-uniform distribution of  
548 missing sites can bias posterior predictive distributions (Figure 5). This study was the first study to explore  
549 missing data for posterior predictive distributions. In most cases, summary statistics are not explicitly  
550 defined for missing data. For example, how should the GC content be computed for a sequence where 50%  
551 of the sites are missing? We resolved the issue by computing the GC content of only the non-missing sites,  
552 although missing sites could be more concentrated at GC rich regions (Beauchair et al. 2019). Similarly, how  
553 should the minimum distance between two sequence without overlap be computed? Our approach was to  
554 simply omit these sequences. These two examples show the importance of simulating missing data with the  
555 same distribution as the observed data to not bias summary statistics. Since the prevalence of missing data  
556 increases for phylogenomic studies, we need to find better solutions to incorporate missing sequence data  
557 into our analyses and summary statistics, both for filtering as well as model adequacy testing.

558

## CONCLUSIONS

559 The primary aim of this study was to estimate a time-calibrated phylogeny of Lampyridae. We used the  
560 previously published 436 AHE loci from Martin et al. (2019). To calibrate the phylogeny, we employed  
561 the recently developed fossilized birth-death-range process (Stadler et al. 2018) together with standard

562 relaxed-clock models (Drummond et al. 2006) in a Bayesian framework, as implemented in the software  
563 **RevBayes** (Höhna et al. 2016). Full Bayesian relaxed-clock divergence time estimation analyses cannot  
564 handle datasets with hundreds of loci without sacrificing model complexity. Instead, we selected three  
565 different data subsets and found that divergence time estimates agreed for all clades that were identical  
566 between analyses (Figure ??). We estimated a crown age of Lampyridae of 139.85 [108.43, 165.68] Ma which  
567 is considerably older than some previous estimates (Kusy et al. 2018; Zhang et al. 2018; Amaral et al. 2019;  
568 McKenna et al. 2019) but matches recent findings of earliest fossils belonging to Lampyridae (Kazantsev  
569 2015) and is in agreement with some other studies (Bocak et al. 2016; Toussaint et al. 2017; Zhang et al.  
570 2020) obtained from taxonomically broader studies. Thus, divergence time estimation using hundreds of loci  
571 is robust if a representative data subset is chosen. Previous results on topological disagreement depending  
572 on data filtering (*e.g.*, Kuang et al. 2018; McLean et al. 2019) apply to divergence time estimation too.

573 In the process of selecting robust data subsets, we investigated the phylogenetic accuracy of single AHE  
574 loci. We found an unexpected amount of gene tree discordance (Figure 6). We explored the impact of  
575 incomplete lineage sorting, missing sequence data and systematic distribution of highly variable sites using  
576 simulations. The observed gene tree discordance cannot be explained due to incomplete lineage sorting.  
577 Instead, the gene tree discordance most likely originates from data errors (*e.g.*, paralogs and poor align-  
578 ments) or model inadequacy (Figure 5). Surprisingly, our standard phylogenetic substitution models are not  
579 adequate for even a single AHE locus. We showed that this model inadequacy is not due to missing data  
580 (Figure 5) although missing data influence the distribution of summary statistics (Figure 4). More work on  
581 understanding the causes of the apparent gene tree discordance is needed. It is paramount to have robust  
582 gene trees not only for phylogeny and divergence time estimation but also to draw any conclusions about  
583 biological processes such as incomplete lineage sorting, horizontal gene transfer and gene flow.

## 584 ACKNOWLEDGEMENTS

585 This research was supported by the Deutsche Forschungsgemeinschaft (DFG) Emmy Noether-Program  
586 HO 6201/1-1 awarded to SH.

## 587 REFERENCES

- 588 Abadi, S., D. Azouri, T. Pupko, and I. Mayrose. 2019. Model selection may not be a mandatory step for  
589 phylogeny reconstruction. *Nature communications* 10:1–11.
- 590 Alda, F., V. A. Tagliacollo, M. J. Bernt, B. T. Waltz, W. B. Ludt, B. C. Faircloth, M. E. Alfaro, J. S.  
591 Albert, and P. Chakrabarty. 2019. Resolving deep nodes in an ancient radiation of neotropical fishes in  
592 the presence of conflicting signals from incomplete lineage sorting. *Systematic Biology* 68:573–593.
- 593 Alekseev, V. I. 2019. New extinct Eocene Coleoptera in Baltic amber of Friedhelm Eichmanns collection  
594 (Germany). *Baltic Journal of Coleopterology* 19:11–22.

- 595 Altekar, G., S. Dwarkadas, J. P. Huelsenbeck, and F. Ronquist. 2004. Parallel metropolis coupled Markov  
596 chain Monte Carlo for Bayesian phylogenetic inference. *Bioinformatics* 20:407–415.
- 597 Amaral, D. T., I. A. S. Bonatelli, R. Cerri, and V. R. Viviani. 2019. Phylogenomic analyses and divergence  
598 time estimation of Elateroidea (Coleoptera) based on RNA-Seq data. *Comparative Biochemistry and*  
599 *Physiology Part D: Genomics and Proteomics* 30:283–289.
- 600 Andermann, T., M. F. Torres Jiménez, P. Matos-Maraví, R. Batista, J. L. Blanco-Pastor, A. L. S. Gustafsson,  
601 L. Kistler, I. M. Liberal, B. Oxelman, C. D. Bacon, et al. 2020. A guide to carrying out a phylogenomic  
602 target sequence capture project. *Frontiers in genetics* 10:1407.
- 603 Arcila, D., G. Ortí, R. Vari, J. W. Armbruster, M. L. J. Stiassny, K. D. Ko, M. H. Sabaj, J. Lundberg, L. J.  
604 Revell, and R. Betancur-R. 2017. Genome-wide interrogation advances resolution of recalcitrant groups in  
605 the tree of life 1:1–10.
- 606 Arcila, D., R. A. Pyron, J. C. Tyler, G. Ortí, and R. Betancur-R. 2015. An evaluation of fossil tip-dating ver-  
607 sus node-age calibrations in tetraodontiform fishes (Teleostei: Percomorphaceae). *Molecular Phylogenetics*  
608 *and Evolution* 82:131–145.
- 609 Arguello, J. R., S. Laurent, and A. G. Clark. 2019. Demographic history of the human commensal *Drosophila*  
610 *melanogaster*. *Genome biology and evolution* 11:844–854.
- 611 Baele, G., M. S. Gill, P. Bastide, P. Lemey, and M. A. Suchard. 2021. Markov-modulated continuous-time  
612 Markov chains to identify site-and branch-specific evolutionary variation in BEAST. *Systematic Biology*  
613 70:181–189.
- 614 Beauclair, L., C. Ramé, P. Arensburger, B. Piégu, F. Guillou, J. Dupont, and Y. Bigot. 2019. Sequence  
615 properties of certain GC rich avian genes, their origins and absence from genome assemblies: case studies.  
616 *BMC genomics* 20:1–16.
- 617 Betancur-R, R., D. Arcila, R. P. Vari, L. C. Hughes, C. Oliveira, M. H. Sabaj, and G. Orti. 2019. Phyloge-  
618 nomic incongruence, hypothesis testing, and taxonomic sampling: The monophyly of characiform fishes.  
619 *Evolution* 73:329–345.
- 620 Bianconi, M. E., J. Hackel, M. S. Vorontsova, A. Alberti, W. Arthan, S. V. Burke, M. R. Duvall, E. A.  
621 Kellogg, S. Lavergne, M. R. McKain, et al. 2020. Continued adaptation of C4 photosynthesis after an  
622 initial burst of changes in the Andropogoneae grasses. *Systematic Biology* 69:445–461.
- 623 Bocak, L., R. Kunderata, C. A. Fernández, and A. P. Vogler. 2016. The discovery of Iberobaeniidae  
624 (Coleoptera: Elateroidea): a new family of beetles from Spain, with immatures detected by environmental  
625 DNA sequencing. *Proceedings of the Royal Society B: Biological Sciences* 283:20152350.
- 626 Bollback, J. P. 2002. Bayesian model adequacy and choice in phylogenetics. *Molecular Biology and Evolution*  
627 19:1171–1180.



- 628 Bossert, S., E. A. Murray, A. Pauly, K. Chernyshov, S. G. Brady, and B. N. Danforth. 2021. Gene tree  
629 estimation error with ultraconserved elements: An empirical study on *Pseudapis* bees. *Systematic Biology*  
630 70:803–821.
- 631 Branham, M. A. and J. W. Wenzel. 2001. The evolution of bioluminescence in cantharoids (Coleoptera:  
632 Elateroidea). *Florida Entomologist* Pages 565–586.
- 633 Bravo, G. A., A. Antonelli, C. D. Bacon, K. Bartoszek, M. P. K. Blom, S. Huynh, G. Jones, L. L. Knowles,  
634 S. Lamichhaney, T. Marcussen, et al. 2019. Embracing heterogeneity: coalescing the Tree of Life and the  
635 future of phylogenomics. *PeerJ* 7:e6399.
- 636 Brown, J. M. 2014. Predictive approaches to assessing the fit of evolutionary models. *Systematic Biology*  
637 63:289–292.
- 638 Brown, J. M. and R. C. Thomson. 2017. Bayes factors unmask highly variable information content, bias,  
639 and extreme influence in phylogenomic analyses. *Systematic Biology* Page syw101.
- 640 Brown, J. M. and R. C. Thomson. 2018. Evaluating model performance in evolutionary biology. *Annual*  
641 *Review of Ecology, Evolution, and Systematics* 49:95–114.
- 642 Burbrink, F. T., F. G. Grazziotin, R. A. Pyron, D. Cundall, S. Donnellan, F. Irish, J. S. Keogh, F. Kraus,  
643 R. W. Murphy, B. Noonan, et al. 2020. Interrogating genomic-scale data for squamata (lizards, snakes,  
644 and amphisbaenians) shows no support for key traditional morphological relationships. *Systematic Biology*  
645 69:502–520.
- 646 Crossley, M. S., S. I. Rondon, and S. D. Schoville. 2019. Patterns of genetic differentiation in colorado potato  
647 beetle correlate with contemporary, not historic, potato land cover. *Evolutionary Applications* 12:804–814.
- 648 Degnan, J. H. and N. A. Rosenberg. 2009. Gene tree discordance, phylogenetic inference and the multispecies  
649 coalescent. *Trends in ecology & evolution* 24:332–340.
- 650 Donoghue, P. C. J. and Z. Yang. 2016. The evolution of methods for establishing evolutionary timescales.  
651 *Philosophical Transactions of the Royal Society B: Biological Sciences* 371:20160020.
- 652 Drummond, A., S. Ho, M. Phillips, and A. Rambaut. 2006. Relaxed Phylogenetics and Dating with Confi-  
653 dence. *PLoS Biology* 4:e88.
- 654 Drummond, A., M. Suchard, D. Xie, and A. Rambaut. 2012. Bayesian phylogenetics with BEAUti and the  
655 BEAST 1.7. *Molecular Biology and Evolution* 29:1969–1973.
- 656 Duchêne, D. A., S. Duchêne, and S. Y. Ho. 2017. New Statistical Criteria Detect Phylogenetic Bias Caused  
657 by Compositional Heterogeneity. *Molecular Biology and Evolution* 34:1529–1534.
- 658 Ericson, P. G., M. Irestedt, J. A. Nylander, L. Christidis, L. Joseph, and Y. Qu. 2020. Parallel evolution  
659 of bower-building behavior in two groups of bowerbirds suggested by phylogenomics. *Systematic Biology*  
660 69:820–829.

- 661 Faircloth, B. C., J. E. McCormack, N. G. Crawford, M. G. Harvey, R. T. Brumfield, and T. C. Glenn. 2012.  
662 Ultraconserved elements anchor thousands of genetic markers spanning multiple evolutionary timescales.  
663 *Systematic biology* 61:717–726.
- 664 Fallon, T. R., S. E. Lower, C.-H. Chang, M. Bessho-Uehara, G. J. Martin, A. J. Bewick, M. Behringer, H. J.  
665 Debat, I. Wong, J. C. Day, et al. 2018. Firefly genomes illuminate parallel origins of bioluminescence in  
666 beetles. *Elife* 7:e36495.
- 667 Felsenstein, J. 2004. *Inferring Phylogenies*. Sunderland, Massachusetts: Sinauer Associates.
- 668 Foster, P. G. 2004. Modeling compositional heterogeneity. *Systematic Biology* 53:485–495.
- 669 Freitas, F. V., M. G. Branstetter, T. Griswold, and E. A. B. Almeida. 2021. Partitioned gene-tree analyses  
670 and gene-based topology testing help resolve incongruence in a phylogenomic study of host-specialist bees  
671 (Apidae: Eucerinae). *Molecular Biology and Evolution* 38:1090–1100.
- 672 Gavryushkina, A., T. A. Heath, D. T. Ksepka, T. Stadler, D. Welch, and A. J. Drummond. 2017. Bayesian  
673 total-evidence dating reveals the recent crown radiation of penguins. *Systematic Biology* 66:57–73.
- 674 Hamilton, C. A., R. A. St Laurent, K. Dexter, I. J. Kitching, J. W. Breinholt, A. Zwick, M. J. Timmermans,  
675 J. R. Barber, and A. Y. Kawahara. 2019. Phylogenomics resolves major relationships and reveals significant  
676 diversification rate shifts in the evolution of silk moths and relatives. *BMC evolutionary biology* 19:1–13.
- 677 Harrington, R. C., B. C. Faircloth, R. I. Eytan, W. L. Smith, T. J. Near, M. E. Alfaro, and M. Friedman.  
678 2016. Phylogenomic analysis of carangimorph fishes reveals flatfish asymmetry arose in a blink of the  
679 evolutionary eye. *BMC Evolutionary Biology* 16:1–14.
- 680 Heer, O. 1865. *Die urwelt der schweiz*. F. Schulthess.
- 681 Ho, S. Y. and S. Duchêne. 2014. Molecular-clock methods for estimating evolutionary rates and timescales.  
682 *Molecular ecology* 23:5947–5965.
- 683 Höhna, S., L. M. Coghill, G. G. Mount, R. C. Thomson, and J. M. Brown. 2018. P<sup>3</sup>: Phylogenetic Posterior  
684 Prediction in RevBayes. *Molecular biology and evolution* 35:1028–1034.
- 685 Höhna, S., M. Landis, and T. Heath. 2017. Phylogenetic inference using revbayes. *Current protocols in*  
686 *bioinformatics* 57:6–16.
- 687 Höhna, S., M. J. Landis, T. A. Heath, B. Boussau, N. Lartillot, B. R. Moore, J. P. Huelsenbeck, and  
688 F. Ronquist. 2016. RevBayes: Bayesian Phylogenetic Inference Using Graphical Models and an Interactive  
689 Model-Specification Language. *Systematic Biology* 65:726–736.
- 690 Huang, H. and L. L. Knowles. 2009. What is the danger of the anomaly zone for empirical phylogenetics?  
691 *Systematic Biology* 58:527–536.
- 692 Huelsenbeck, J. P. and B. Rannala. 2004. Frequentist Properties of Bayesian Posterior Probabilities of Phy-  
693 logenetic Trees Under Simple and Complex Substitution Models. *Systematic Biology* 53:904–913.

- 694 Jarvis, E. D., S. Mirarab, A. J. Aberer, B. Li, P. Houde, C. Li, S. Y. Ho, B. C. Faircloth, B. Nabholz, J. T.  
695 Howard, et al. 2014. Whole-genome analyses resolve early branches in the tree of life of modern birds.  
696 Science 346:1320–1331.
- 697 Jusoh, W. F. A., L. Ballantyne, C. L. Lambkin, N. R. Hashim, and N. Wahlberg. 2018. The firefly genus  
698 *Pteroptyx* Olivier revisited (Coleoptera: Lampyridae: Luciolinae). Zootaxa 4456:1–71.
- 699 Kapopoulou, A., M. Kapun, B. Pieper, P. Pavlidis, R. Wilches, P. Duchon, W. Stephan, and S. Laurent.  
700 2020. Demographic analyses of a new sample of haploid genomes from a swedish population of *Drosophila*  
701 *melanogaster*. Scientific reports 10:1–8.
- 702 Kazantsev, S. V. 2012. New omethid and lampyrid taxa from the Baltic Amber (Insecta: Coleoptera).  
703 Zootaxa 3186:59–63.
- 704 Kazantsev, S. V. 2015. *Protoluciola albertalleni* gen. n., sp. n., a new Luciolinae firefly (Insecta: Coleoptera:  
705 Lampyridae) from Burmite amber. Russian Entomological Journal 24:281–283.
- 706 Keightley, P. D., A. Pinharanda, R. W. Ness, F. Simpson, K. K. Dasmahapatra, J. Mallet, J. W. Davey,  
707 and C. D. Jiggins. 2015. Estimation of the spontaneous mutation rate in *Heliconius melpomene*. Molecular  
708 biology and evolution 32:239–243.
- 709 Kuang, T., L. Tornabene, J. Li, J. Jiang, P. Chakrabarty, J. S. Sparks, G. J. P. Naylor, and C. Li. 2018.  
710 Phylogenomic analysis on the exceptionally diverse fish clade Gobioidae (Actinopterygii: Gobiiformes) and  
711 data-filtering based on molecular clocklikeness. Molecular Phylogenetics and Evolution 128:192–202.
- 712 Kusy, D., M. Motyka, C. Andujar, M. Bocek, M. Masek, K. Sklenarova, F. Kokas, M. Bocakova, A. P.  
713 Vogler, and L. Bocak. 2018. Genome sequencing of *Rhinorhipus Lawrence* exposes an early branch of the  
714 Coleoptera. Frontiers in zoology 15:1–14.
- 715 Kutschera, V. E., T. Bidon, F. Hailer, J. L. Rodi, S. R. Fain, and A. Janke. 2014. Bears in a forest of  
716 gene trees: phylogenetic inference is complicated by incomplete lineage sorting and gene flow. Molecular  
717 Biology and Evolution 31:2004–2017.
- 718 Lartillot, N., H. Brinkmann, and H. Philippe. 2007. Suppression of long-branch attraction artefacts in the  
719 animal phylogeny using a site-heterogeneous model. BMC evolutionary biology 7:S4.
- 720 Leite, R. N., R. T. Kimball, E. L. Braun, E. P. Derryberry, P. A. Hosner, G. E. Derryberry, M. Anciaes, J. S.  
721 McKay, A. Aleixo, C. C. Ribas, R. T. Brumfield, and J. Cracraft. 2021. Phylogenomics of manakins (Aves:  
722 Pipridae) using alternative locus filtering strategies based on informativeness. Molecular Phylogenetics and  
723 Evolution 155:107013.
- 724 Lemmon, A. R. and E. C. Moriarty. 2004. The importance of proper model assumption in Bayesian phylo-  
725 genetics. Systematic Biology 53:265–277.
- 726 Lewis, S. M. and C. K. Cratsley. 2008. Flash signal evolution, mate choice, and predation in fireflies. Annu.  
727 Rev. Entomol. 53:293–321.

- 728 Li, F., L. Shao, and S. Li. 2020. Tropical niche conservatism explains the eocene migration from india to  
729 southeast asia in ochyroceratid spiders. *Systematic Biology* 69:987–998.
- 730 Lower, S. S., J. S. Johnston, K. F. Stanger-Hall, C. E. Hjelman, S. J. Hanrahan, K. Korunes, and D. Hall.  
731 2017. Genome size in North American fireflies: substantial variation likely driven by neutral processes.  
732 *Genome Biology and Evolution* 9:1499–1512.
- 733 Maddison, W. P. 1997. Gene trees in species trees. *Systematic biology* 46:523–536.
- 734 Martin, G. J., M. A. Branham, M. F. Whiting, and S. M. Bybee. 2017. Total evidence phylogeny and the  
735 evolution of adult bioluminescence in fireflies (Coleoptera: Lampyridae). *Molecular Phylogenetics and*  
736 *Evolution* 107:564–575.
- 737 Martin, G. J., K. F. Stanger-Hall, M. A. Branham, L. F. L. Da Silveira, S. E. Lower, D. W. Hall, X.-Y. Li,  
738 A. R. Lemmon, E. Moriarty Lemmon, and S. M. Bybee. 2019. Higher-level phylogeny and reclassification  
739 of Lampyridae (Coleoptera: Elateroidea). *Insect Systematics and Diversity* 3:11.
- 740 McDermott, F. A. 1964. The taxonomy of the lampyridae (coleoptera). *Transactions of the American Ento-*  
741 *mological Society* 90:1–72.
- 742 McGowen, M. R., G. Tsagkogeorga, S. Álvarez-Carretero, M. Dos Reis, M. Struebig, R. Deaville, P. D.  
743 Jepson, S. Jarman, A. Polanowski, P. A. Morin, et al. 2020. Phylogenomic resolution of the cetacean tree  
744 of life using target sequence capture. *Systematic Biology* 69:479–501.
- 745 McKenna, D. D., S. Shin, D. Ahrens, M. Balke, C. Beza-Beza, D. J. Clarke, A. Donath, H. E. Escalona,  
746 F. Friedrich, H. Letsch, et al. 2019. The evolution and genomic basis of beetle diversity. *Proceedings of*  
747 *the National Academy of Sciences* 116:24729–24737.
- 748 McKenna, D. D., A. L. Wild, K. Kanda, C. L. Bellamy, R. G. Beutel, M. S. Caterino, C. W. Farnum, D. C.  
749 Hawks, M. A. Ivie, M. L. Jameson, R. A. B. Leschen, A. E. Marvaldi, J. V. McHugh, A. F. Newton, J. A.  
750 Robertson, M. K. Thayer, M. F. Whiting, A. Lawrence, John F. Ślipinski, D. R. Maddison, and B. D.  
751 Farrel. 2015. The beetle tree of life reveals that Coleoptera survived end-Permian mass extinction to  
752 diversify during the Cretaceous terrestrial revolution. *Systematic Entomology* 40:835–880.
- 753 McLean, B. S., K. C. Bell, J. M. Allen, K. M. Helgen, and J. A. Cook. 2019. Impacts of inference method and  
754 data set filtering on phylogenomic resolution in a rapid radiation of ground squirrels (Xerinae: Marmotini).  
755 *Systematic Biology* 68:298–316.
- 756 Minh, B. Q., O. Schmidt, Heiko A. and Chernomor, D. Schrempf, M. D. Woodhams, A. Von Haeseler, and  
757 R. Lanfear. 2020. IQ-TREE 2: new models and efficient methods for phylogenetic inference in the genomic  
758 era. *Molecular Biology and Evolution* 37:1530–1534.
- 759 Misof, B., S. Liu, K. Meusemann, R. S. Peters, A. Donath, C. Mayer, P. B. Frandsen, J. Ware, T. Flouri,  
760 R. G. Beutel, et al. 2014. Phylogenomics resolves the timing and pattern of insect evolution. *Science*  
761 346:763–767.

- 762 Molloy, E. K. and T. Warnow. 2018. To include or not to include: the impact of gene filtering on species  
763 tree estimation methods. *Systematic Biology* 67:285–303.
- 764 Near, T. J. and M. J. Sanderson. 2004. Assessing the quality of molecular divergence time estimates by fossil  
765 calibrations and fossil-based model selection. *Philosophical Transactions of the Royal Society of London.*  
766 *Series B: Biological Sciences* 359:1477–1483.
- 767 Opatova, V., C. A. Hamilton, M. Hedin, L. M. De Oca, J. Král, and J. E. Bond. 2020. Phylogenetic  
768 systematics and evolution of the spider infraorder mygalomorphae using genomic scale data. *Systematic*  
769 *Biology* 69:671–707.
- 770 Philippe, H., D. M. de Vienne, V. Ranwez, B. Roure, D. Baurain, and F. Delsuc. 2017. Pitfalls in supermatrix  
771 phylogenomics. *European Journal of Taxonomy* .
- 772 Philippe, H., E. A. Snell, E. Baptiste, P. Lopez, P. W. H. Holland, and D. Casane. 2004. Phylogenomics of  
773 eukaryotes: impact of missing data on large alignments. *Molecular Biology and Evolution* 21:1740–1752.
- 774 Reid, N. M., S. M. Hird, J. M. Brown, T. A. Pelletier, J. D. McVay, J. D. Satler, and B. C. Carstens.  
775 2014. Poor fit to the multispecies coalescent is widely detectable in empirical data. *Systematic Biology*  
776 63:322–333.
- 777 Richards, E. J., J. M. Brown, A. J. Barley, R. A. Chong, and R. C. Thomson. 2018. Variation across  
778 mitochondrial gene trees provides evidence for systematic error: how much gene tree variation is biological?  
779 *Systematic Biology* 67:847–860.
- 780 Rokas, A., B. L. Williams, N. King, and S. B. Carroll. 2003. Genome-scale approaches to resolving incon-  
781 gruence in molecular phylogenies. *Nature* 425:798–804.
- 782 Romiguier, J., V. Ranwez, F. Delsuc, N. Galtier, and E. J. Douzery. 2013. Less is more in mammalian phy-  
783 logenomics: AT-rich genes minimize tree conflicts and unravel the root of placental mammals. *Molecular*  
784 *Biology and Evolution* 30:2134–2144.
- 785 Ronquist, F., S. Klopfstein, L. Vilhelmsen, S. Schulmeister, D. L. Murray, and A. P. Rasnitsyn. 2012. A total-  
786 evidence approach to dating with fossils, applied to the early radiation of the hymenoptera. *Systematic*  
787 *Biology* 61:973–999.
- 788 Rosenberg, N. A. and R. Tao. 2008. Discordance of species trees with their most likely gene trees: the case  
789 of five taxa. *Systematic biology* 57:131–140.
- 790 Roure, B., D. Baurain, and H. Philippe. 2013. Impact of missing data on phylogenies inferred from empirical  
791 phylogenomic data sets. *Molecular Biology and Evolution* 30:197–214.
- 792 Saladin, B., A. B. Leslie, R. O. Wüest, G. Litsios, E. Conti, N. Salamin, and N. E. Zimmermann. 2017. Fossils  
793 matter: improved estimates of divergence times in *Pinus* reveal older diversification. *BMC evolutionary*  
794 *biology* 17:1–15.

- 795 Sanderson, M. J. 2003. r8s: inferring absolute rates of molecular evolution and divergence times in the  
796 absence of a molecular clock. *Bioinformatics* 19:301–302.
- 797 Sanderson, M. J., A. Purvis, and C. Henze. 1998. Phylogenetic supertrees: Assembling the trees of life.  
798 *Trends in Ecology & Evolution* 13:105–109.
- 799 Shen, X.-X., C. T. Hittinger, and A. Rokas. 2017. Contentious relationships in phylogenomic studies can be  
800 driven by a handful of genes. *Nature Ecology & Evolution* 1:0126.
- 801 Smith, S. A., J. W. Brown, and J. F. Walker. 2018. So many genes, so little time: A practical approach to  
802 divergence-time estimation in the genomic era. *PLoS One* 13:e0197433.
- 803 Smith, S. A. and B. C. O’Meara. 2012. treePL: divergence time estimation using penalized likelihood for  
804 large phylogenies. *Bioinformatics* 28:2689–2690.
- 805 Stadler, T., A. Gavryushkina, R. C. M. Warnock, A. J. Drummond, and T. A. Heath. 2018. The fossilized  
806 birth-death model for the analysis of stratigraphic range data under different speciation modes. *Journal*  
807 *of Theoretical Biology* 447:41–55.
- 808 Stamatakis, A. 2014. RAxML version 8: a tool for phylogenetic analysis and post-analysis of large phyloge-  
809 nies. *Bioinformatics* 30:1312–1313.
- 810 Stanger-Hall, K. F. and J. E. Lloyd. 2015. Flash signal evolution in *Photinus* fireflies: character displacement  
811 and signal exploitation in a visual communication system. *Evolution* 69:666–682.
- 812 Stanger-Hall, K. F., J. E. Lloyd, and D. M. Hillis. 2007. Phylogeny of North American fireflies (Coleoptera:  
813 Lampyridae): implications for the evolution of light signals. *Molecular Phylogenetics and Evolution* 45:33–  
814 49.
- 815 Tagliacollo, V. A. and R. Lanfear. 2018. Estimating improved partitioning schemes for ultraconserved ele-  
816 ments. *Molecular Biology and Evolution* 35:1798–1811.
- 817 Tavaré, S. 1986. Some probabilistic and statistical problems in the analysis of DNA sequences. In: *Some*  
818 *Mathematical Questions in Biology—DNA Sequence Analysis*, Miura RM (Ed.), American Mathematical  
819 Society, Providence (RI) 17:57–86.
- 820 Thomson, R. C. and H. B. Shaffer. 2010. Sparse supermatrices for phylogenetic inference: taxonomy, align-  
821 ment, rogue taxa, and the phylogeny of living turtles. *Systematic Biology* 59:42–58.
- 822 Toussaint, E. F. A., M. Seidel, E. Arriaga-Varela, J. Hájek, D. Kral, L. Sekerka, A. E. Z. Short, and  
823 M. Fikáček. 2017. The peril of dating beetles. *Systematic Entomology* 42:1–10.
- 824 Townsend, J. P. 2007. Profiling phylogenetic informativeness. *Systematic biology* 56:222–231.
- 825 Walker, J. F., J. W. Brown, and S. A. Smith. 2018. Analyzing contentious relationships and outlier genes in  
826 phylogenomics. *Systematic Biology* 67:916–924.

- 827 Wickham, H. F. 1912. A report on some recent collections of fossil Coleoptera from the Miocene shales of  
828 Florissant. *Bulletin of the Laboratories of Natural History of the State University of Iowa* 6:3 – 38.
- 829 Wiens, J. J. 2003. Missing data, incomplete taxa, and phylogenetic accuracy. *Systematic Biology* 52:528–538.
- 830 Wu, C.-H., M. A. Suchard, and A. J. Drummond. 2013. Bayesian selection of nucleotide substitution models  
831 and their site assignments. *Molecular Biology and Evolution* 30:669–688.
- 832 Yang, Z. 1994. Maximum likelihood phylogenetic estimation from DNA sequences with variable rates over  
833 sites: approximate methods. *Journal of Molecular Evolution* 39:306–314.
- 834 Yang, Z. 1996. Among-site rate variation and its impact on phylogenetic analyses. *Trends in Ecology &*  
835 *Evolution* 11:367–372.
- 836 Yang, Z. and B. Rannala. 2006. Bayesian Estimation of Species Divergence Times Under a Molecular Clock  
837 Using Multiple Fossil Calibrations with Soft Bounds. *Molecular Biology and Evolution* 23:212–226.
- 838 Zaragoza-Caballero, S. 2007. A new species of photinus (coleoptera: Lampyridae: Photinini) from jalisco,  
839 mexico, with comments on intraspecific aedeagal variability and a key to the species of the subgenus  
840 paraphotinus. *Zootaxa* 1437:61–67.
- 841 Zaragoza-Caballero, S. 2015. Nuevas especies de photinus (coleoptera: Lampyridae: Photinini) del bosque  
842 tropical caducifolio del pacífico mexicano. *Revista mexicana de biodiversidad* 86:638–651.
- 843 Zaragoza-Caballero, S., S. López-Pérez, V. Vega-Badillo, D. E. Domínguez-León, G. M. Rodríguez-Mirón,  
844 M. González-Ramírez, I. G. Gutiérrez-Carranza, P. Cifuentes-Ruiz, and M. L. Zurita-García. 2020.  
845 Luciérnagas del centro de México (coleoptera: Lampyridae): descripción de 37 especies nuevas. *Revista*  
846 *mexicana de biodiversidad* 91.
- 847 Zhang, C., M. Rabiee, E. Sayyari, and S. Mirarab. 2018. ASTRAL-III: polynomial time species tree recon-  
848 struction from partially resolved gene trees. *BMC bioinformatics* 19:15–30.
- 849 Zhang, R. and A. Drummond. 2020. Improving the performance of Bayesian phylogenetic inference under  
850 relaxed clock models. *BMC evolutionary biology* 20:1–28.
- 851 Zhang, R., J. He, Z. Dong, G. Liu, Y. Yin, X. Zhang, Q. Li, Y. Ren, Y. Yang, W. Liu, et al. 2020. Genomic  
852 and experimental data provide new insights into luciferin biosynthesis and bioluminescence evolution in  
853 fireflies. *Scientific reports* 10:1–19.
